# Supplementary material for: Defining the Basis of Cyanine Phototruncation Enables a New Approach to Single-Molecule Localization Microscopy
Source: PubMed Central journal article supplement — ACS Cent Sci. 2021 Jun 3;7(7):1144–55. doi: 10.1021/acscentsci.1c00483 (PMC8323251; doi:10.1021/acscentsci.1c00483), 2021-06-03
Supplement: oc1c00483_si_001.pdf [file oc1c00483_si_001.pdf]

Supplementary information  
for  
**Defining the Basis of Cyanine Phototruncation Enables A New Approach to Single  
Molecule Localization Microscopy**

Siddharth S. Matikonda,<sup>a</sup> Dominic A. Helmerich,<sup>b</sup> Mara Meub,<sup>b</sup> Gerti Beliu,<sup>b</sup> Philip  
Kollmannsberger,<sup>c</sup> Alexander Greer,<sup>d,e\*</sup> Markus Sauer,<sup>b\*</sup> Martin J. Schnermann<sup>a\*</sup>

<sup>a</sup>Chemical Biology Laboratory, Center for Cancer Research, National Cancer Institute,  
Frederick, MD, 21702, United States E-mail: martin.schnermann@nih.gov

<sup>b</sup>Department of Biotechnology and Biophysics, Biocenter, Julius-Maximilians-Universität  
Würzburg, Am Hubland, 97074 Würzburg, Germany E-mail: m.sauer@uni-wuerzburg.de

<sup>c</sup>Center for Computational and Theoretical Biology, University of Würzburg, Campus Hubland  
Nord 32, 97074, Würzburg, Germany

<sup>d</sup>Department of Chemistry, Brooklyn College, City University of New York, Brooklyn, NY,  
USA E-mail: AGreer@brooklyn.cuny.edu

<sup>e</sup> Ph.D. Program in Chemistry, The Graduate Center of the City University of New York, 365  
Fifth Avenue, New York, New York 10016, United States

**Table of Contents**

|                            |     |
|----------------------------|-----|
| Supplemental Tables        | S2  |
| Supplemental Figures       | S6  |
| General experimental       | S25 |
| Synthesis and NMR analysis | S26 |
| Computational analysis     | S30 |
| References                 | S45 |

## Supplemental Tables

**Table S1.** Calculated and Observed HRMS (ESI) masses for photo-irradiated products

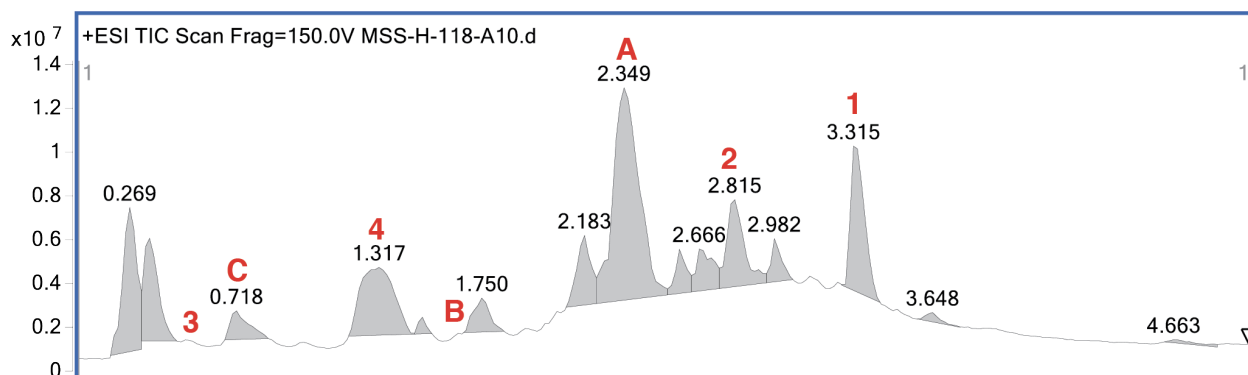

| Entry    | Compound                                                                            | Empirical Formula      | Calculated m/z | Observed m/z                   |
|----------|-------------------------------------------------------------------------------------|------------------------|----------------|--------------------------------|
| <b>1</b> | 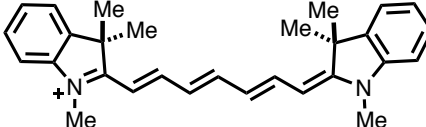   | $C_{29}H_{33}N_2^+$    | 409.2638       | 409.25553<br>[M] <sup>+</sup>  |
| <b>2</b> |   | $C_{27}H_{31}N_2^+$    | 383.2482       | 383.2482<br>[M] <sup>+</sup>   |
| <b>3</b> |  | $C_{16}H_{18}NO^+$     | 240.1383       | 240.1387<br>[M] <sup>+</sup>   |
| <b>4</b> |  | $C_{11}H_{13}NO$       | 175.0997       | 176.1068<br>[M+H] <sup>+</sup> |
| <b>A</b> |  | $C_{29}H_{33}N_2O_2^+$ | 441.2537       | 441.2539<br>[M] <sup>+</sup>   |
| <b>B</b> |  | $C_{18}H_{20}NO^+$     | 266.1539       | 266.1539<br>[M] <sup>+</sup>   |
| <b>C</b> |  | $C_{13}H_{15}NO$       | 201.1154       | 202.1224<br>[M+H] <sup>+</sup> |

**Table S2.** Evaluating the truncation of **2** to **3** with independently generated ROS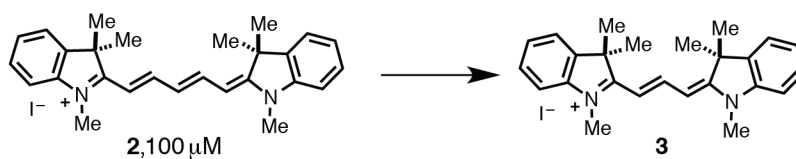

| Entry | Conditions                                                                                                                            | Yield <b>2</b> <sup>a</sup> | Yield <b>3</b> <sup>a</sup>                         |
|-------|---------------------------------------------------------------------------------------------------------------------------------------|-----------------------------|-----------------------------------------------------|
| 1     | dark<br>PBS (10 mM)                                                                                                                   | 99.5 ( $\pm$ 1.6)           | $\sim$ 0.30                                         |
| 2     | 740 nm $h\nu$ 0.5 W/cm <sup>2</sup><br>PBS (10 mM)                                                                                    | 0.14 ( $\pm$ 0.06)          | <b>1.42 (<math>\pm</math> 0.10)</b>                 |
| 3     | 740 nm $h\nu$ 0.5 W/cm <sup>2</sup><br>Ethanol                                                                                        | 0.8 ( $\pm$ 0.02)           | $\sim$ 0.01                                         |
| 4     | Zn(TPP) 5 mol%<br>420 nm $h\nu$ 2 mW/cm <sup>2</sup><br>50% MeCN/H <sub>2</sub> O                                                     | 83.2 ( $\pm$ 1.6)           | <b><math>\sim</math>1.2 (<math>\pm</math> 0.01)</b> |
| 5     | H <sub>2</sub> O <sub>2</sub> 100 $\mu$ M<br>PBS (10 mM)<br>pH = 7.4 ( <b>H<sub>2</sub>O<sub>2</sub></b> )                            | 94.9 ( $\pm$ 1.9)           | $\sim$ 0.1 ( $\pm$ 0.16)                            |
| 6     | KO <sub>2</sub> 100 $\mu$ M<br>PBS (10 mM)<br>pH = 7.4 ( <b>O<sub>2</sub><sup>-</sup></b> )                                           | 86.3 ( $\pm$ 3.1)           | $\sim$ 0.1 ( $\pm$ 0.02)                            |
| 7     | FeCl <sub>2</sub> 200 $\mu$ M<br>H <sub>2</sub> O <sub>2</sub> 1 mM<br>NaHPO <sub>4</sub> (50 mM)<br>pH = 6 ( <b>HO<sup>•</sup></b> ) | 3.4 ( $\pm$ 1.2)            | $\sim$ 0.1 ( $\pm$ 0.03)                            |
| 8     | 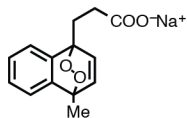<br>4000 $\mu$ M, 60 °C<br>PBS (10 mM)             | 86.9 ( $\pm$ 1.4)           | <b><math>\sim</math>1.1 (<math>\pm</math> 0.23)</b> |

<sup>a</sup> Determined by UV-vis and reported in percent. Values are average of experimental triplicate. Error expressed as standard deviation in parentheses.

**Table S3.** Evaluating the role of irradiation on **1** to **2** phototruncation keeping the total photons constant.

| # | Power (mW cm <sup>-2</sup> ) | Time (min) | % <b>2</b> formed <sup>a</sup> |
|---|------------------------------|------------|--------------------------------|
| 1 | 8                            | 128 min    | 1.96 ± 0.15                    |
| 2 | 16                           | 64 min     | 1.81 ± 0.13                    |
| 3 | 31                           | 32 min     | 1.85 ± 0.16                    |
| 4 | 62                           | 16 min     | 1.80 ± 0.10                    |
| 5 | 125                          | 8 min      | 1.93 ± 0.14                    |
| 6 | 250                          | 4 min      | 1.71 ± 0.12                    |
| 7 | 500                          | 2 min      | 1.82 ± 0.10                    |

<sup>a</sup>The yield of **2** formed was calculated using Beer-lambert law (from a starting **1** concentration of 100 μM). The absorbance at 640 nm was measured after photo-irradiating the sample in a glass autosampler vial (containing a fused insert). The absorption coefficient (ε) of **2** in water was calculated to be 230,400 M<sup>-1</sup>cm<sup>-1</sup>. Experiments conducted in triplicate with the error expressed in standard deviation of mean.

**Table S4.** Evaluating the role of irradiation power on **1** to **2** phototruncation keeping the irradiation time constant.

| # | Power (mW cm <sup>-2</sup> ) | Time (min) | % <b>2</b> formed <sup>a</sup> |
|---|------------------------------|------------|--------------------------------|
| 1 | 8                            | 2 min      | –                              |
| 2 | 16                           | 2 min      | 0.03 ± 0.01                    |
| 3 | 31                           | 2 min      | 0.06 ± 0.05                    |
| 4 | 62                           | 2 min      | 0.29 ± 0.07                    |
| 5 | 125                          | 2 min      | 0.64 ± 0.15                    |
| 6 | 250                          | 2 min      | 1.13 ± 0.22                    |
| 7 | 500                          | 2 min      | 1.82 ± 0.10                    |

<sup>a</sup>The yield of **2** formed was calculated using Beer-lambert law (from a starting **1** concentration of 100 μM). The absorbance at 640 nm was measured after photo-irradiating the sample in a glass autosampler vial (containing a fused insert). The absorption coefficient (ε) of **2** in water was calculated to be 230,400 M<sup>-1</sup>cm<sup>-1</sup>. Experiments conducted in triplicate with the error expressed in standard deviation of mean.

**Table S5.** Top-20 conditions from Comprehensive screen.

| Buffer # | Solute                       | Concentration | pH   | Buffer Name       | Buffer Conc. | Solvent | % conversion<br>(384-well plate<br>method) | % conversion<br>(using larger volumes in a glass vial) |           |           | Average<br>(Method - II) | std dev<br>(Method - II) |
|----------|------------------------------|---------------|------|-------------------|--------------|---------|--------------------------------------------|--------------------------------------------------------|-----------|-----------|--------------------------|--------------------------|
|          |                              |               |      |                   |              |         |                                            | Attempt-1                                              | Attempt-2 | Attempt-3 |                          |                          |
| 1        |                              |               | 9.5  | CAPSO             | 1000 mM      | water   | 9.5                                        | 14.7                                                   | 15.5      | 15.4      | 15.2                     | 0.4                      |
| 2        |                              |               | 9.2  | CAPSO with saline | 1000 mM      | water   | 8.5                                        | 13.3                                                   | 13.5      | 11.6      | 12.8                     | 1.0                      |
| 3        | 1,3-diaminopropanol          | 100 mM        | 9    |                   |              | water   | 7.4                                        | 10.6                                                   | 11.1      | 11.4      | 11.0                     | 0.4                      |
| 4        | Arginine                     | 100 mM        | 9    | CAPSO             | 1000 mM      | water   | 6.6                                        | 10.4                                                   | 10.1      | 10.8      | 10.4                     | 0.4                      |
| 5        | Arginine                     | 100 mM        | 9    |                   |              | water   | 6.6                                        | 10.2                                                   | 10.4      | 11.2      | 10.6                     | 0.5                      |
| 6        | Arginine                     | 100 mM        | 9.8  |                   |              | water   | 6.4                                        | 9.7                                                    | 10.3      | 10.4      | 10.1                     | 0.4                      |
| 7        | Arginine                     | 100 mM        | 10   |                   |              | water   | 6.3                                        | 10.2                                                   | 9.5       | 9.7       | 9.8                      | 0.4                      |
| 8        | Arginine                     | 100 mM        | 9.2  | CAPSO with saline | 1000 mM      | water   | 5.7                                        | 8.6                                                    | 8.3       | 9.8       | 8.9                      | 0.8                      |
| 9        | 1,3-diaminopropanol          | 100 mM        | 9.25 | CAPSO             | 1000 mM      | water   | 5.3                                        | 9.5                                                    | 9.9       | 9.8       | 9.7                      | 0.2                      |
| 10       | 1,3-diaminopropanol + lysine | 100 mM        | 8.9  | CAPSO             | 1000 mM      | water   | 5.2                                        | 9.6                                                    | 9.2       | 8.8       | 9.2                      | 0.4                      |
| 11       | Histidine                    | 10 mM         | 7.4  | Phosphate Buffer  | 10 mM        | water   | 5.1                                        | 9.3                                                    | 8.5       | 9.3       | 9.0                      | 0.5                      |
| 12       | Arginine                     | 100 mM        | 9.2  | BIS-TRIS          | 1000 mM      | water   | 5.0                                        | 8.7                                                    | 8.1       | 7.9       | 8.2                      | 0.4                      |
| 13       | Histidine                    | 100 mM        | 10   |                   |              | water   | 4.9                                        | 9.3                                                    | 8.5       | 8.4       | 8.7                      | 0.5                      |
| 14       | Lysine                       | 100 mM        | 10   |                   |              | water   | 4.9                                        | 8.7                                                    | 8.1       | 9.4       | 8.7                      | 0.7                      |
| 15       | Alanine                      | 100 mM        | 10   |                   |              | water   | 4.8                                        | 8.8                                                    | 8.2       | 7.8       | 8.3                      | 0.5                      |
| 16       | Lysine                       | 10 mM         | 8.5  | TRIS              | 100 mM       | water   | 4.8                                        | 8.3                                                    | 8.1       | 7.3       | 7.9                      | 0.5                      |
| 17       | Arginine                     | 10 mM         | 7.4  | Phosphate Buffer  | 10 mM        | water   | 4.7                                        | 8.2                                                    | 7.6       | 8.1       | 8.0                      | 0.3                      |
| 18       | Histidine                    | 100 mM        | 7.4  |                   |              | water   | 4.6                                        | 8.2                                                    | 8.5       | 7.8       | 8.2                      | 0.4                      |
| 19       | 1,3-diaminopropanol          | 100 mM        | 9.5  | CAPSO with saline | 1000 mM      | water   | 4.6                                        | 8.2                                                    | 8.5       | 8.1       | 8.3                      | 0.2                      |
| 20       | Lysine                       | 100 mM        | 9.2  | BIS-TRIS          | 1000 mM      | water   | 4.6                                        | 7.4                                                    | 7.6       | 7.1       | 7.4                      | 0.3                      |

The yield of **2** formed was calculated using Beer-lambert law (from a starting **1** concentration of 50  $\mu\text{M}$ ). The absorbance at 640 nm (**2**) was measured after photo-irradiating the sample in a glass autosampler vial (containing a fused insert). The absorption coefficients ( $\epsilon$ ) of **2** in PBS were calculated to be 230,400  $\text{M}^{-1}\text{cm}^{-1}$ . Experiments conducted in triplicate with the error expressed in standard deviation of mean.

## Supplemental Figures

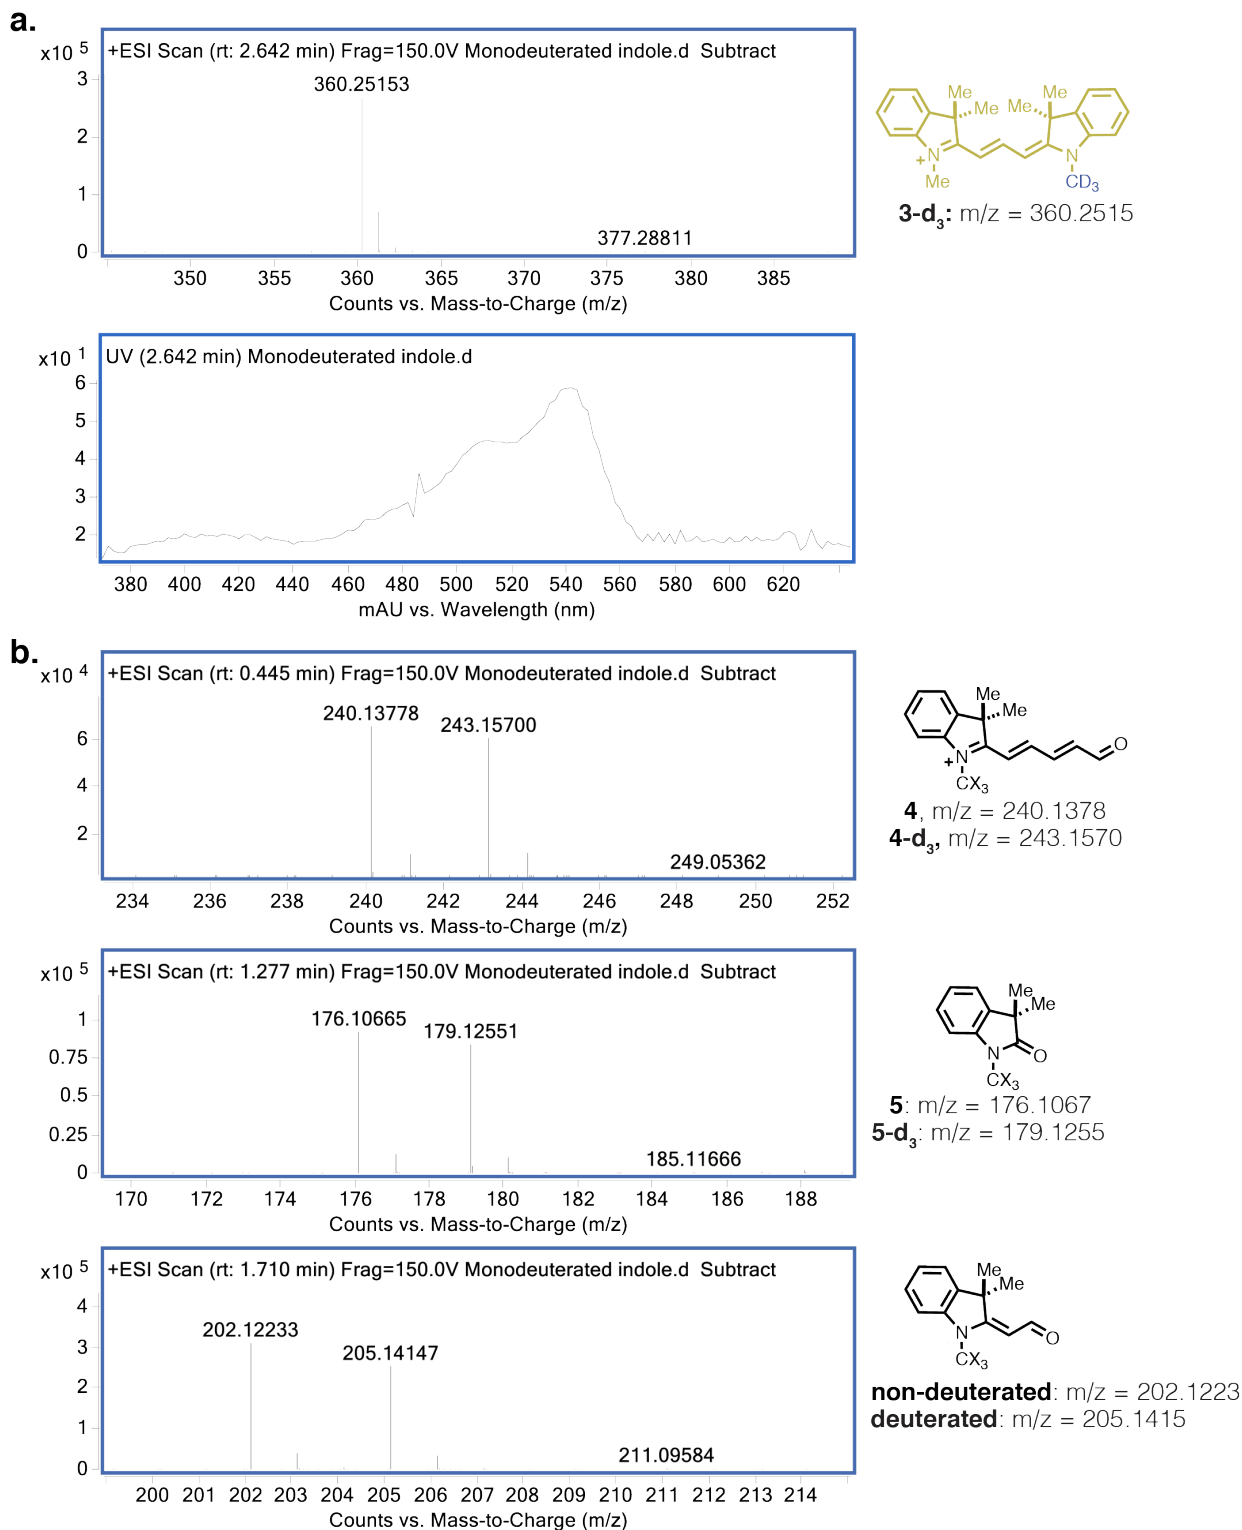

**Figure S1 (continued on next page).** HRESIMS analysis of the product mixture obtained from the irradiation of **2-d<sub>3</sub>** with 630 LED (0.2 mW cm<sup>-2</sup>) in PBS (pH = 7.4) for 60 min. (a) m/z and extracted UV-vis spectra of **3-d<sub>3</sub>** (b) other products observed.

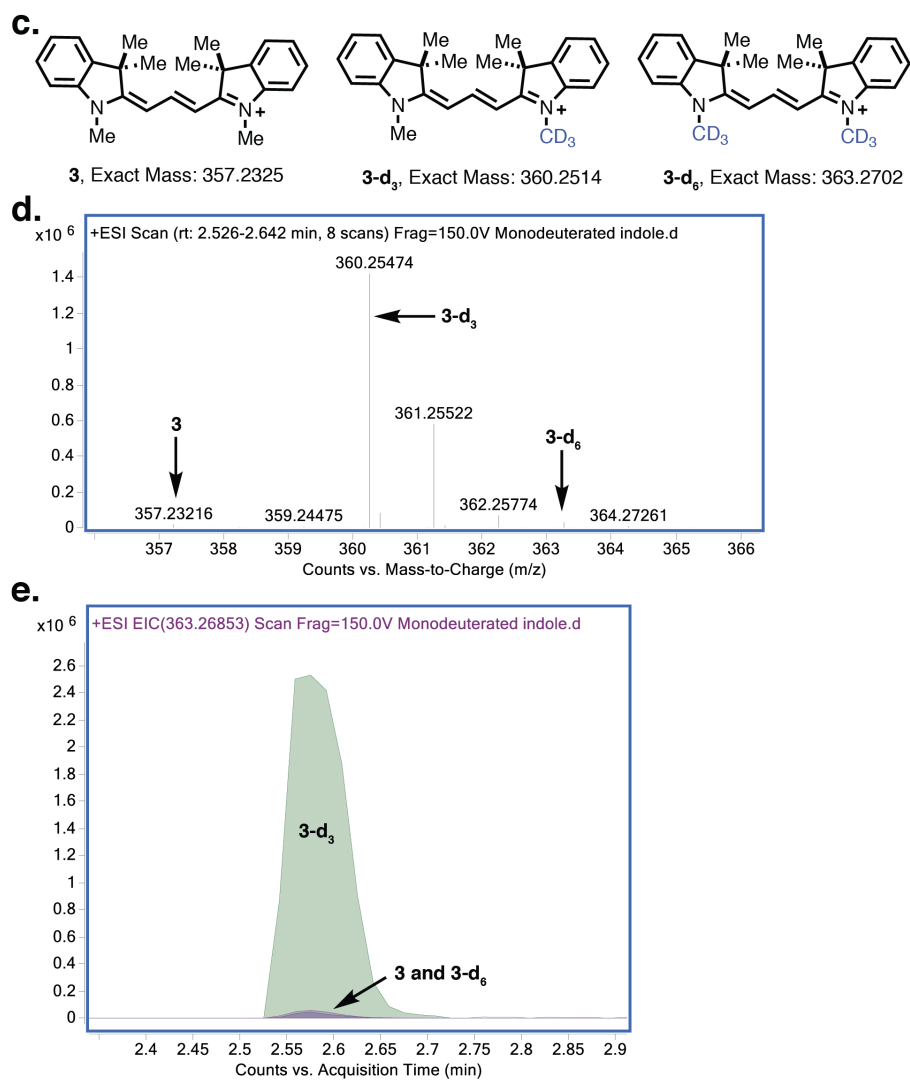

**Figure S1 (continued).** HRESIMS analysis of the product mixture obtained from the irradiation of **2-d<sub>3</sub>** with 630 LED ( $0.2 \text{ mW cm}^{-2}$ ) in PBS (pH = 7.4) for 60 min. (c) Compounds analyzed. (d) m/z for the designated compounds and their (e) extracted ion counts at 357.2321, 360.2547 and 363.2685 within  $\pm 10$  ppm. The relative ratio of the extracted ion counts for **3**, **3-d<sub>3</sub>**, and **3-d<sub>6</sub>** is measured to be 97.8: 0.6: 1.6.





Pentamethine cyanines analyzed:

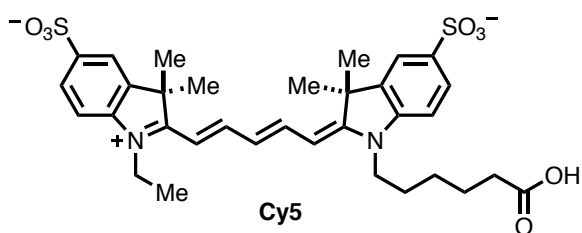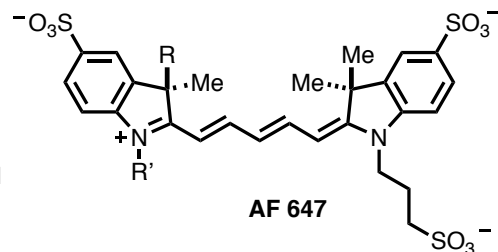

Heptamethine cyanines analyzed:

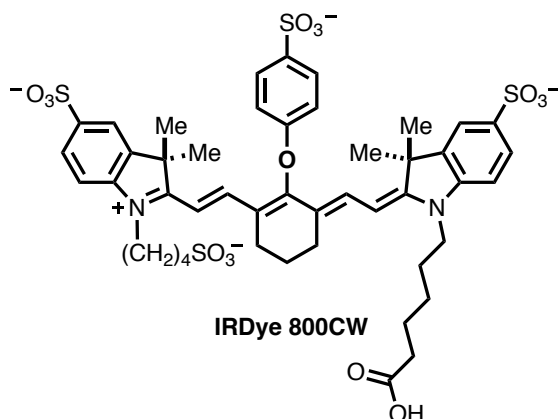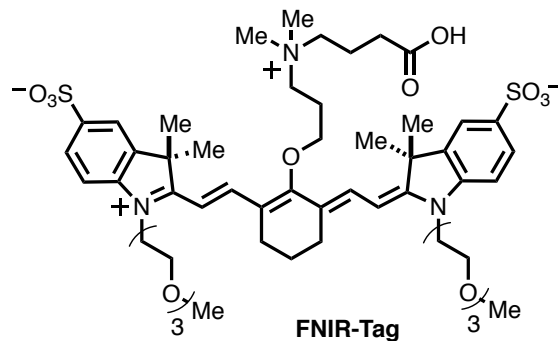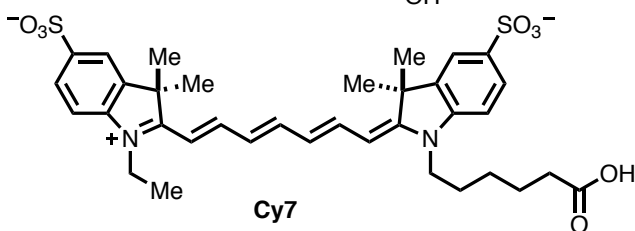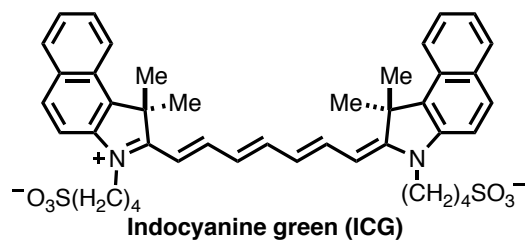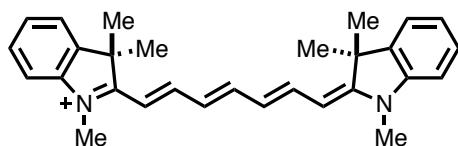

a.

b.

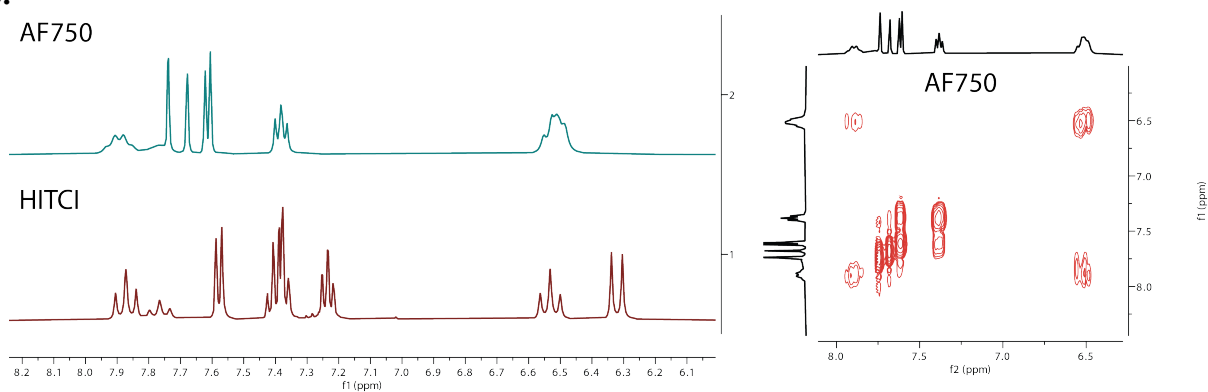

**Figure S3.** (a) Chemical structures of the penta- and heptamethine cyanines analyzed. The exact structure of AF 647 has not been reported. The chemical structure for Alexa Fluor 750 (AF 750) is not yet reported. However, examination of the  $^1\text{H}$  NMR ( $\text{DMSO-d}_6$ ) in (b), suggests an unmodified polymethine chain.

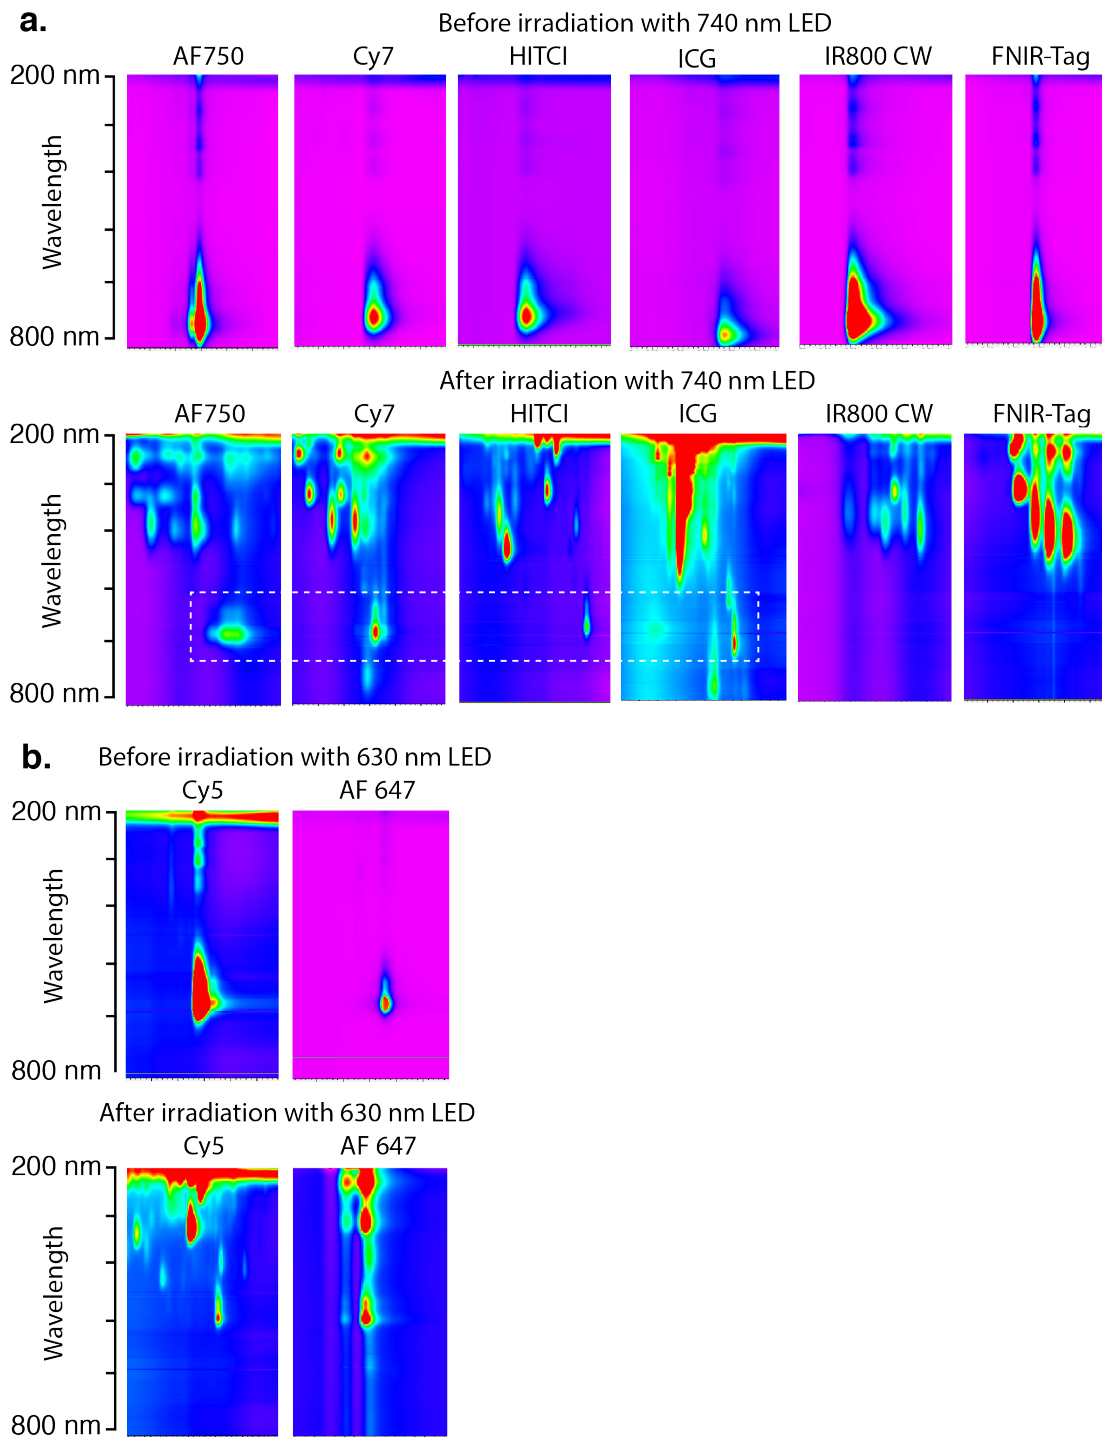

**Figure S4.** Analysis of product distribution of the pre- and post-irradiated (a) heptamethine cyanines and (b) pentamethine cyanines by LC-MS-coupled to photo-diode array detector. Irradiated was conducted on a 50  $\mu\text{M}$  sample in PBS with 740 nm LED at 0.5  $\text{W cm}^{-2}$  or 630 nm LED at 0.2  $\text{mW cm}^{-2}$  for 1h. Absorbance around 650 nm (dotted box) in the case of AF750, Cy7, HITCI, and ICG suggests photobleaching to the corresponding pentamethine cyanine. Mass ions (not shown) of the pentamethine cyanine-like peaks in the case of Cy7, HITCI and ICG matched their corresponding pentamethine cyanine variants.

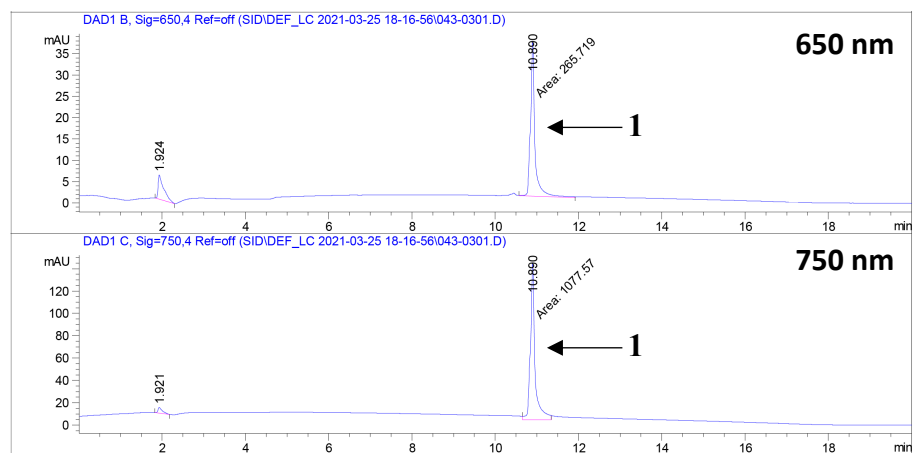

**Figure 5.** Reference HPLC traces of 50  $\mu\text{M}$  **1** ( $R_t = 10.9$  min) at 650 nm (top) and 750 nm (bottom).

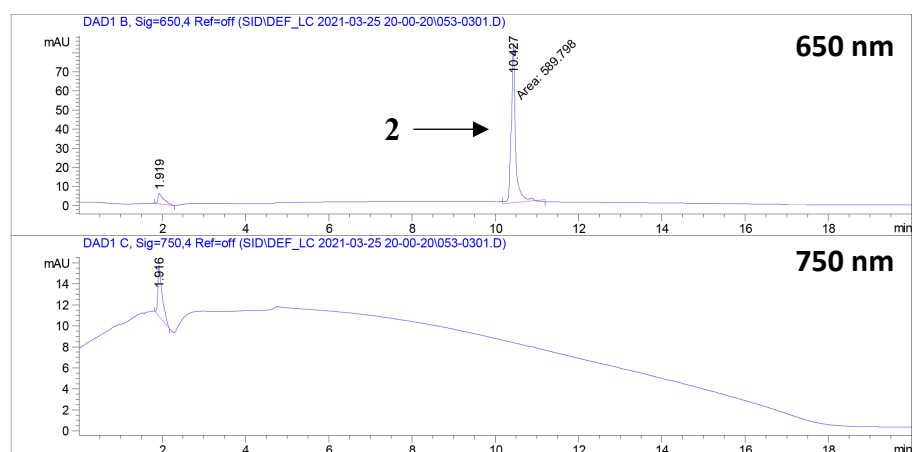

**Figure S6.** Reference HPLC traces of 50  $\mu\text{M}$  **2** ( $R_t = 10.4$  min) at 650 nm (top) and 750 nm (bottom).

**1** (50  $\mu$ M) + Endoperoxide **8** in PBS after heating for 4h at 60  $^{\circ}$ C (in dark)

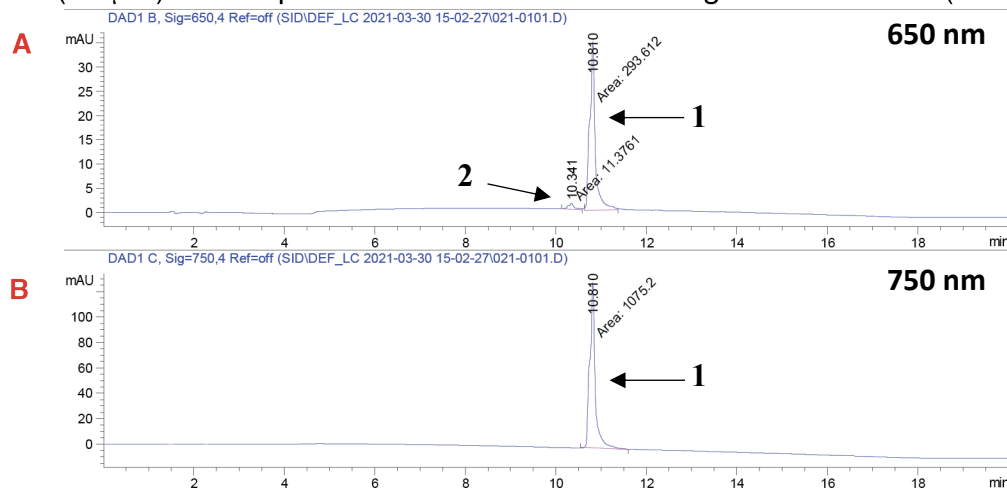

**1** (50  $\mu$ M) in PBS after heating for 4h at 60  $^{\circ}$ C (in dark)

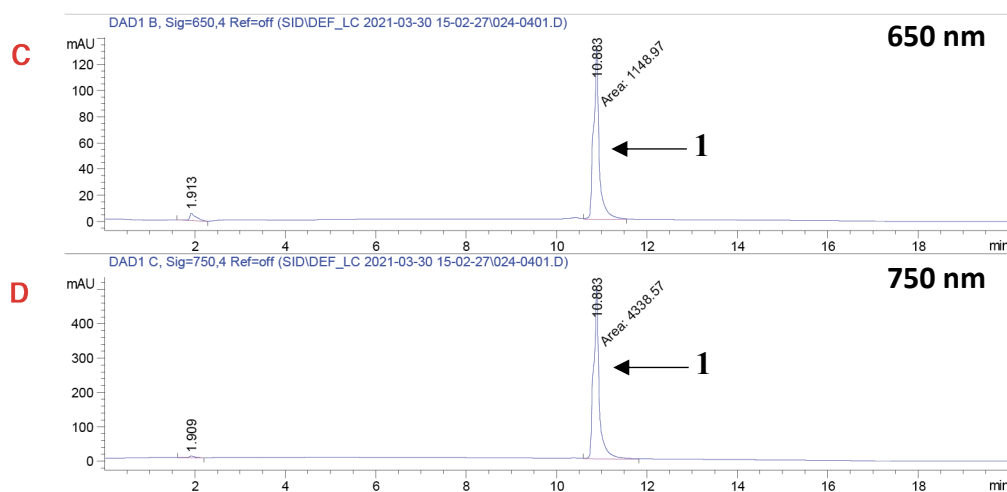

**Figure S7.** HPLC traces at 650 nm (A/C) and 750 nm (B/D) upon heating **1** with (A/B) and without (C/D) the endoperoxide **8** for 4 h in 10 mM PBS at 60  $^{\circ}$ C. Amount of **2** formed in A (at 10.3 min) was measured using the standard curve on Figure S11 and found to be 1.3%. The amount of **1** remaining in D (at 10.9 min) was measured using the standard curve on Figure S10 and found to be 99.2%. HPLC peaks in Figure S5 and S6 used as reference for **1** and **2** respectively.

**1** (50  $\mu$ M) + Endoperoxide **8** in 1M CAPSO (pH = 9.5) after heating for 4h at 60  $^{\circ}$ C (in dark)

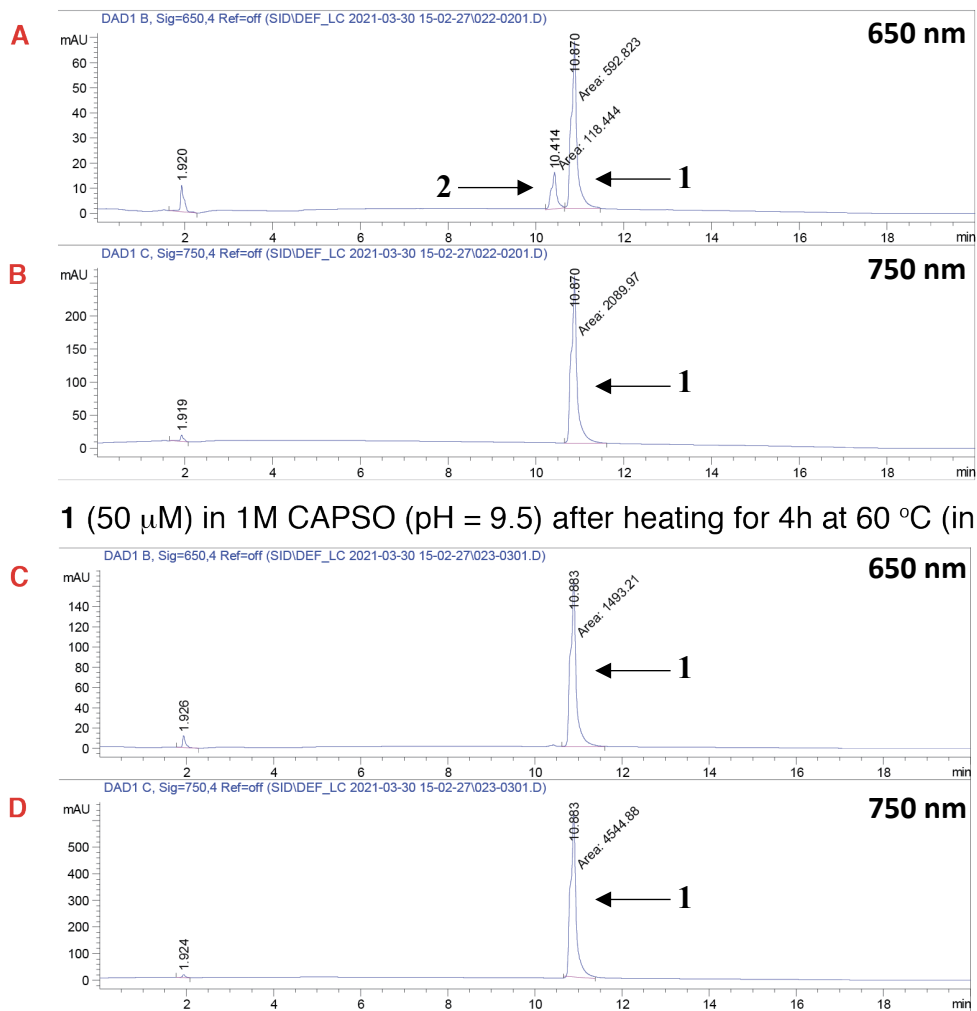

**Figure S8.** HPLC traces at 650 nm (A/C) and 750 nm (B/D) upon heating **1** with (A/B) and without (C/D) the endoperoxide **8** for 4 h in 1M CAPSO at 60  $^{\circ}$ C. Amount of **2** formed in A (at 10.4 min) was measured using the standard curve Figure S11 and found to be 3.8%. The amount of **1** remaining in D (at 10.9 min) was measured using the standard curve Figure S10 and found to be  $\sim$ 100%. HPLC peaks in Figure S5 and S6 used as reference for **1** and **2** respectively.



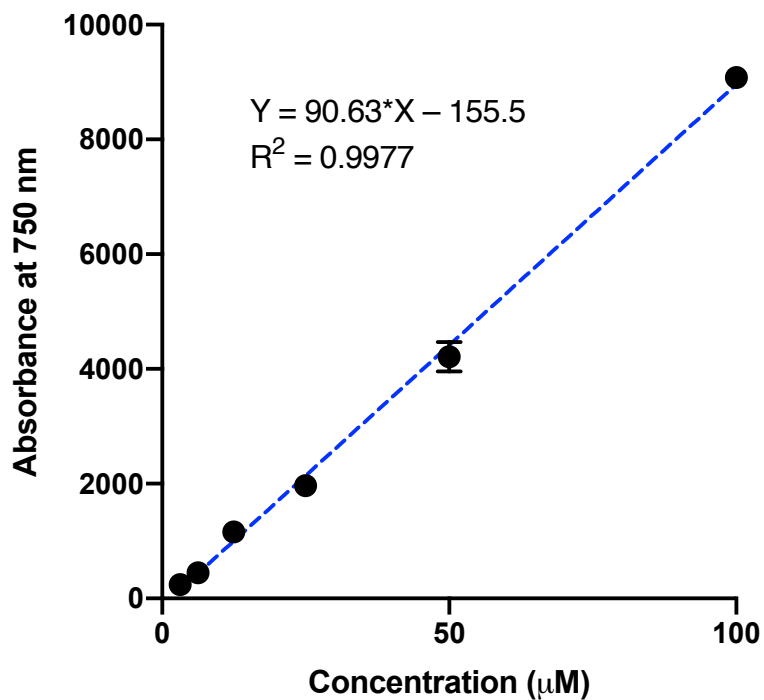

**Figure S10.** Standard curve of **1** in PBS at 750 nm ( $R_t = 10.9$  min). Error bars represent  $\pm$  SD ( $n = 3$ ).

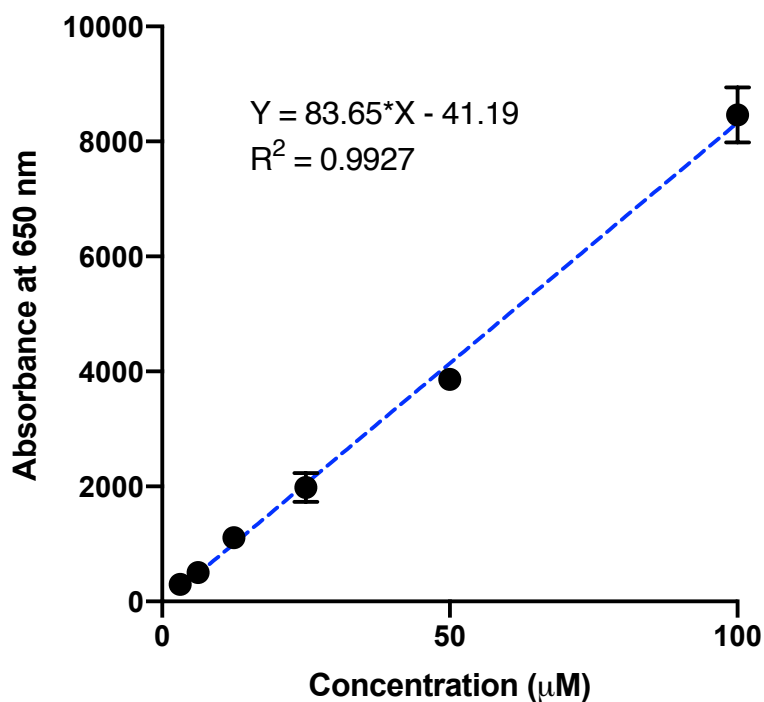

**Figure S11.** Standard curve of **2** in PBS at 650 nm ( $R_t = 10.4$  min). Error bars represent  $\pm$  SD ( $n = 3$ ).



a) 1M CAPSO (pH = 9.5)

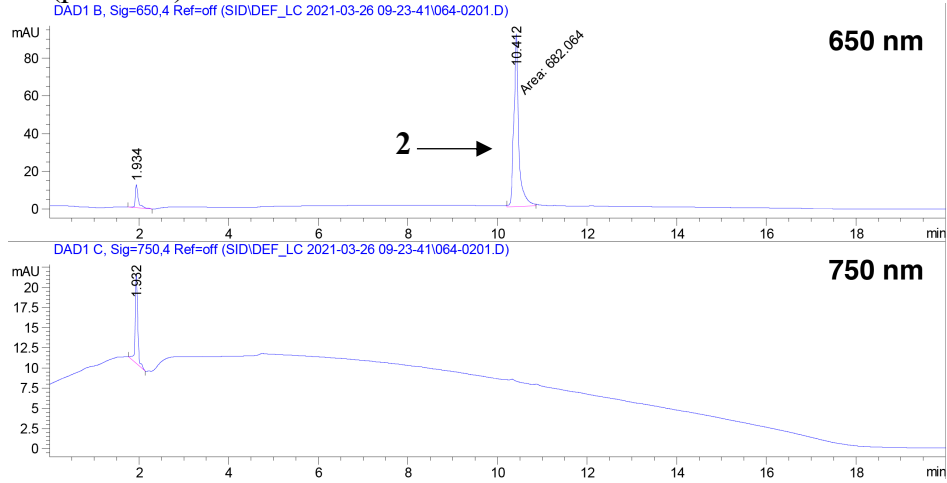

b) 100 mM 1,3-DAPOL (pH = 9.0)

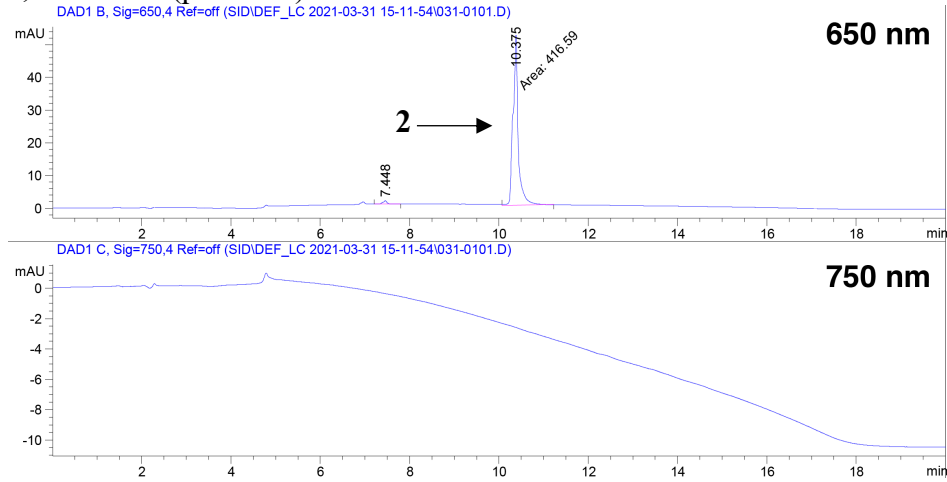

c) 10 mM histidine in PBS (pH = 7.4)

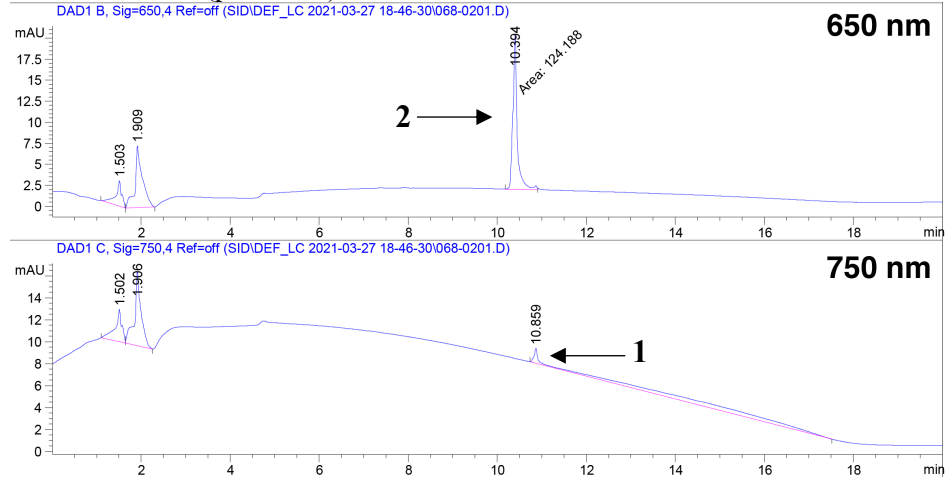

d) 10 mM Arginine in phosphate buffer (pH = 7.4)

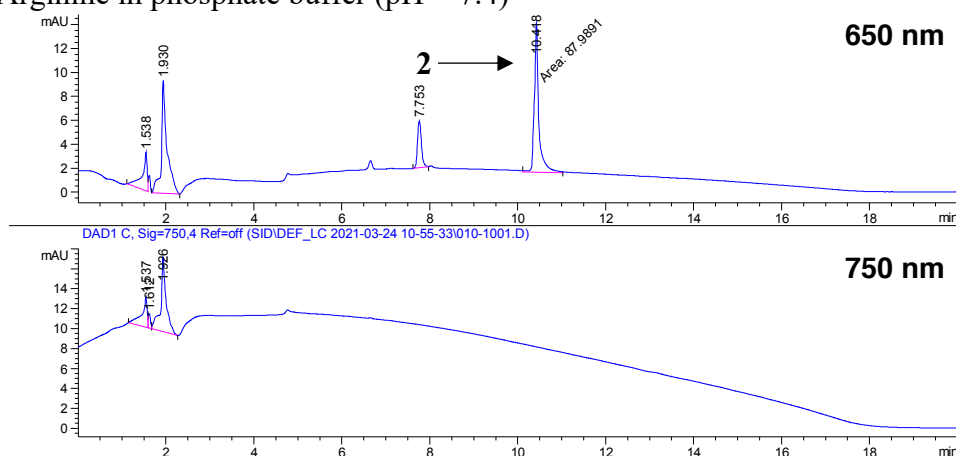

e) 100 mM PBS (pH = 7.4)

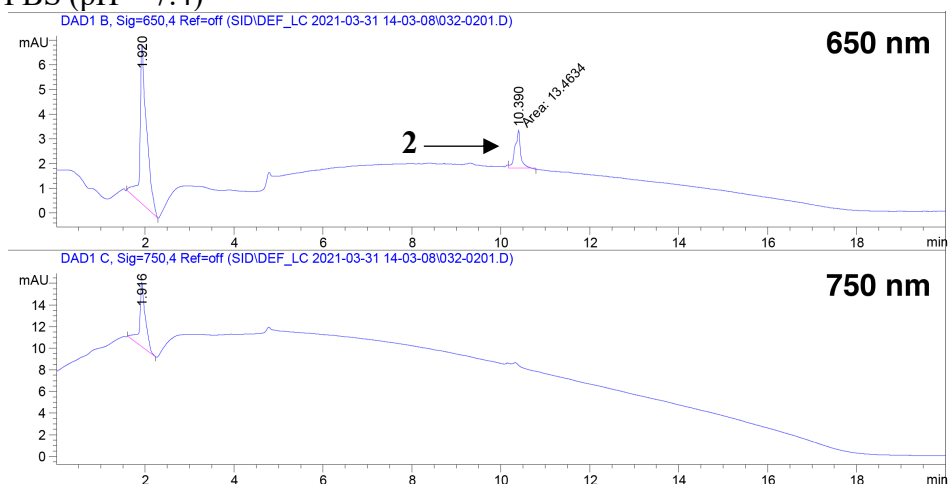

**Figure S12.** HPLC traces of an irradiated (using 740 nm LED at  $0.5 \text{ W cm}^{-2}$  for 60 min) sample containing **1** ( $50 \mu\text{M}$ ) in (a) 1M CAPSO (pH = 9.5), (b) 100 mM DAPOL (pH = 9.0), (c) 10 mM histidine in PBS (pH = 7.4), (d) 10 mM arginine in phosphate buffer (pH = 7.4), and (e) 10 mM PBS (pH = 7.4). HPLC peaks in Figure S5 and S6 used as reference for **1** and **2** respectively.

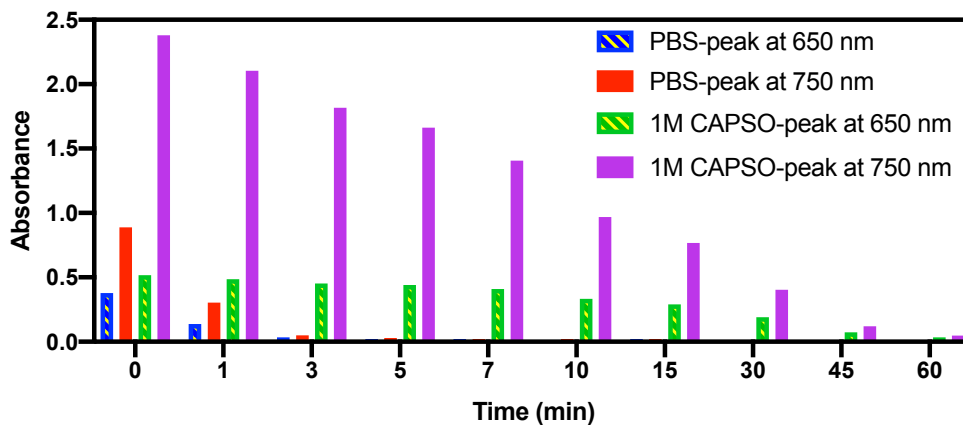

**Figure S13.** Absorbance at 650 nm and 750 nm in 10 mM PBS and 1M CAPSO buffers over 60 mins upon irradiation of **1** (100  $\mu\text{M}$ ) with 640 nm LED ( $0.2 \text{ W cm}^{-2}$ ).

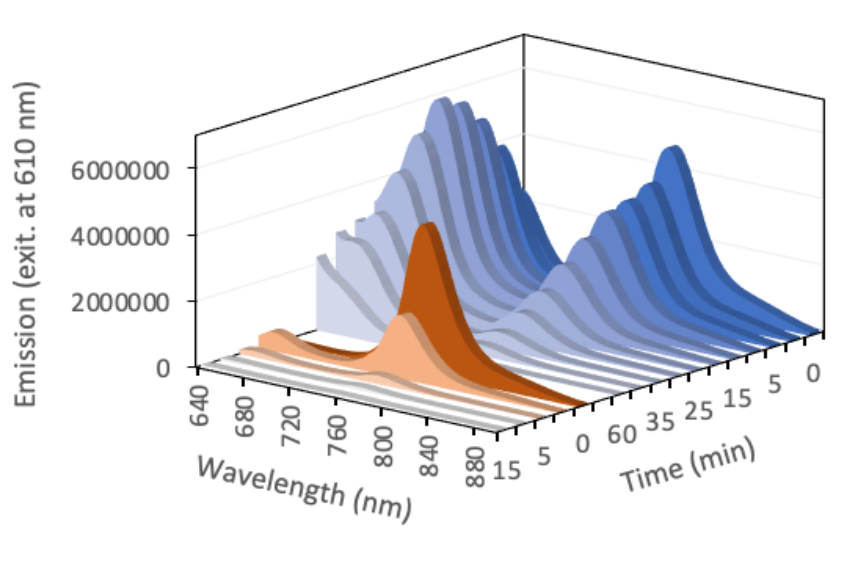

**Figure S14.** Ensemble fluorescence experiments following irradiating **1** for the indicated time with a 630 nm LED in 10 mM PBS (pH = 7.4, orange), 1M and 0.5 M CAPSO (pH = 9.5, blue) buffer. Fluorescence traces measured following excitation using a 630 nm LED ( $0.2 \text{ W cm}^{-2}$ ) for upto 60 mins.

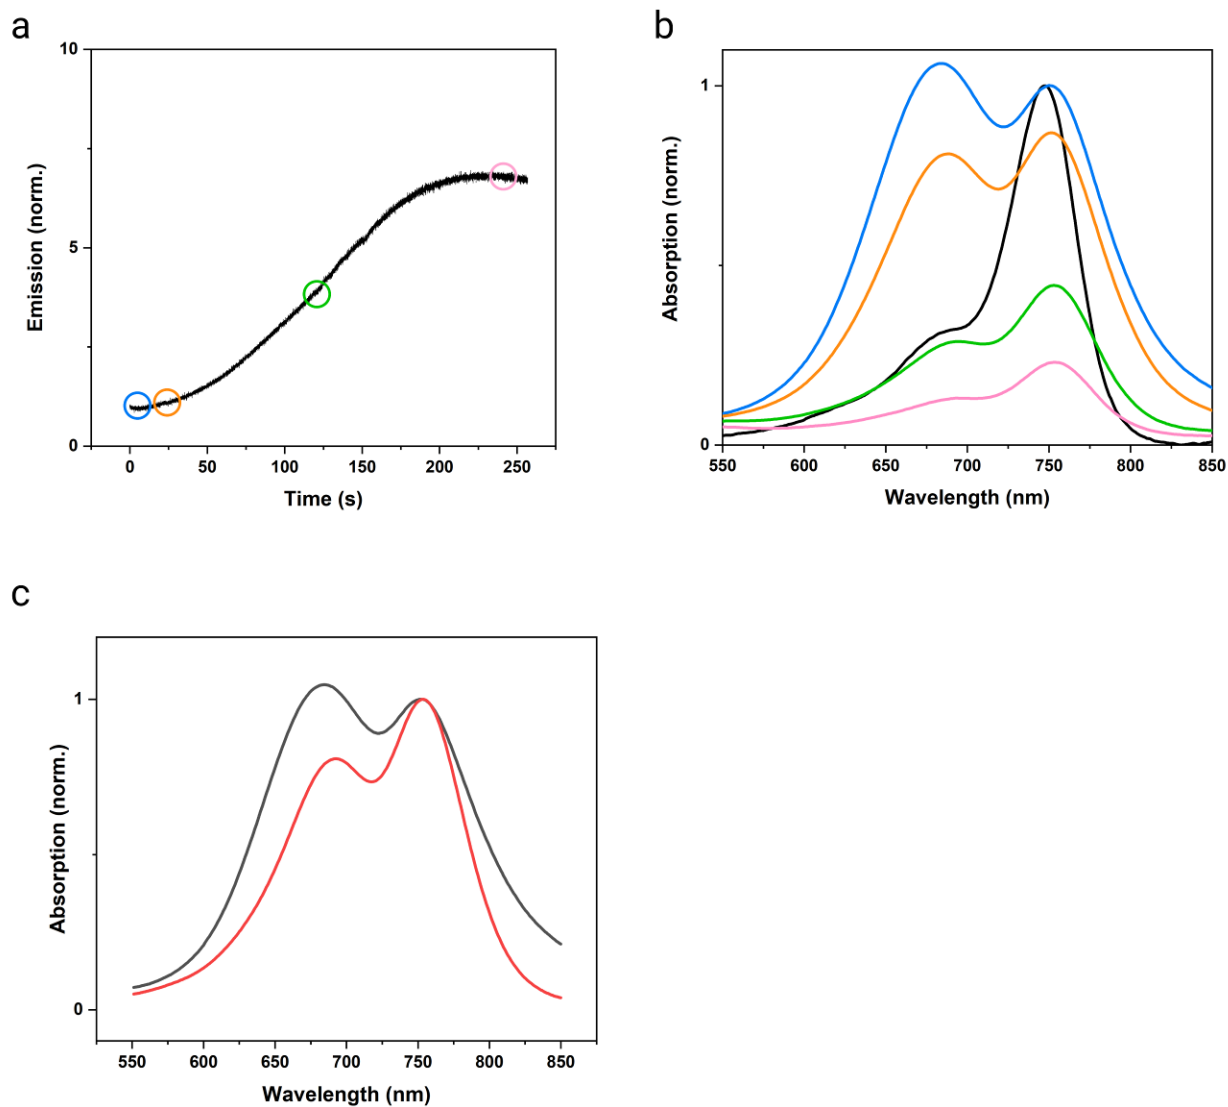

**Figure S15.** Decrease of H-aggregate prior to Cy7 fluorescence increase. Ensemble cuvette measurements of 1  $\mu$ M IgG-gar-Cy7 (DOL  $\sim$ 4) illuminated at 640 nm with an irradiation intensity of 0.1 kW cm<sup>-2</sup>. (a) Fluorescence time course measurement of Cy7 fluorescence in PBS, pH 7.4 beyond a bandpass filter (835  $\pm$  35 nm). (b) Ensemble absorption spectra of the illuminated sample in (a) at different time points (blue: 0 min, orange: 20 min, green: 2 h and rose: 4h) compared to 1  $\mu$ M free Cy7 fluorophores (black). (c) Absorption spectra of 1  $\mu$ M IgG-gar-Cy7 (DOL  $\sim$ 4) in PBS, pH 7.4, (black) and 1M CAPSO, pH 9.5, (red), revealing different dimerization efficiencies.

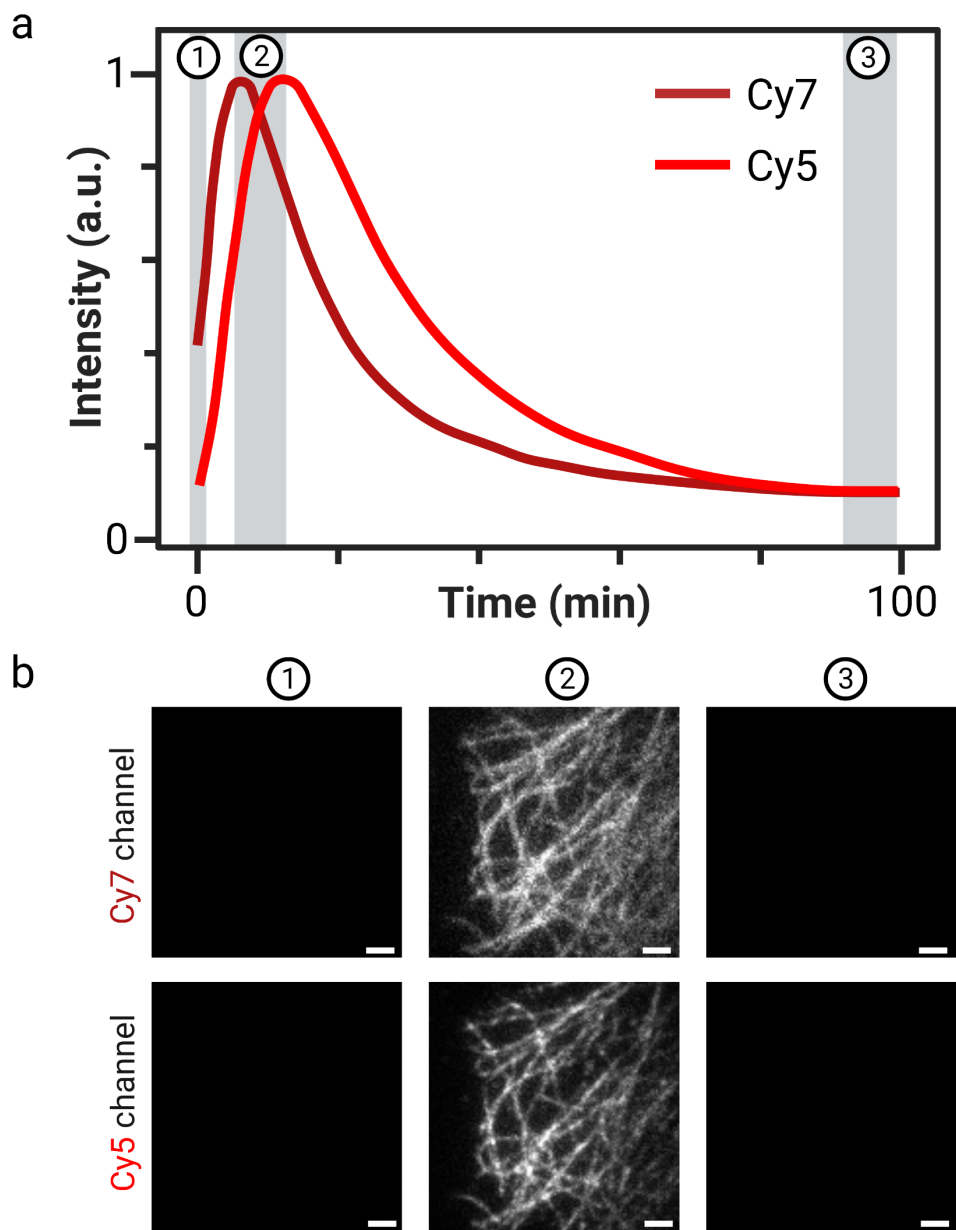

**Figure S16.** (a) Time course of fluorescence signals recorded on a longer wavelength Cy7 channel and a shorter wavelength Cy5 channel in PBS, pH 7.4. (b) Fluorescence imaging was performed in PBS, pH 7.4 at the designated time points (1-3). Bandpass filters used: Cy5 red-channel ( $679 \text{ nm} \pm 21 \text{ nm}$ ) and Cy7 far-red channel ( $835 \pm 35 \text{ nm}$ ).

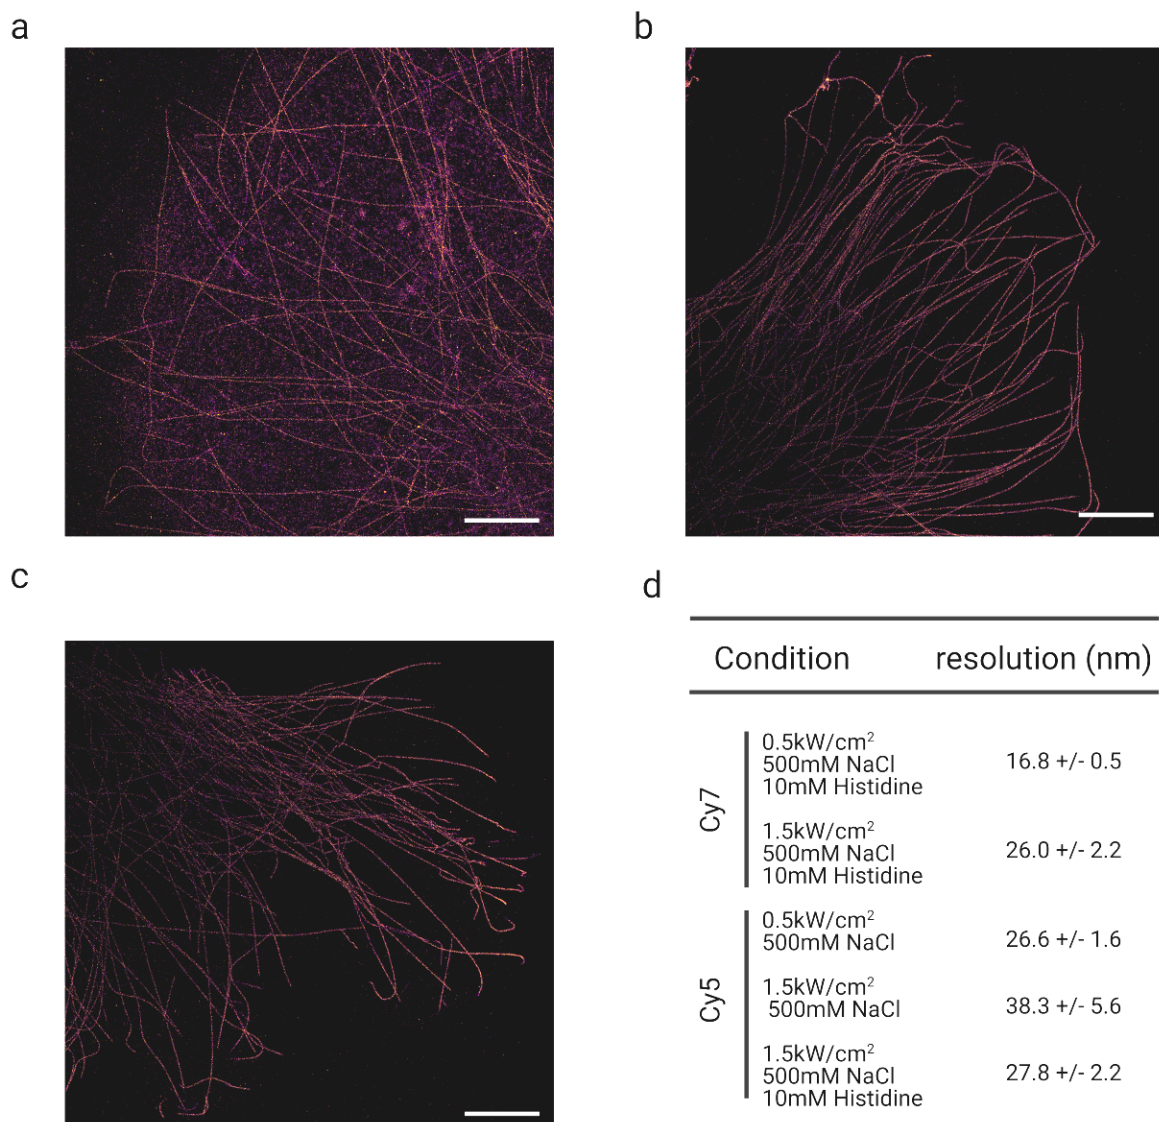

**Figure S17.** Phototruncation DNA-PAINT and conventional DNA-PAINT at high irradiation intensity. (a) Cy7-phototruncation DNA-PAINT image recorded with high irradiation intensity (1.5 kW cm<sup>-2</sup> at 640 nm, 100 ms frame<sup>-1</sup>, 50.000 frames, 100 nM Cy7-imager strand in PBS, pH 7.4, 500 mM NaCl containing 10 mM histidine). (b,c). Conventional DNA-PAINT image recorded with an irradiation intensity of 1.5 kW cm<sup>-2</sup> at 640 nm, 100 ms frame<sup>-1</sup>, 50.000 frames, 100 pM Cy5-imager strand in PBS, pH 7.4, 500 mM NaCl in absence (b) and presence (c) 10 mM histidine). (d) Fourier Ring Correlation (FRC) estimated spatial resolutions for different imaging conditions and irradiation intensities. Scale bars: 5  $\mu$ m.

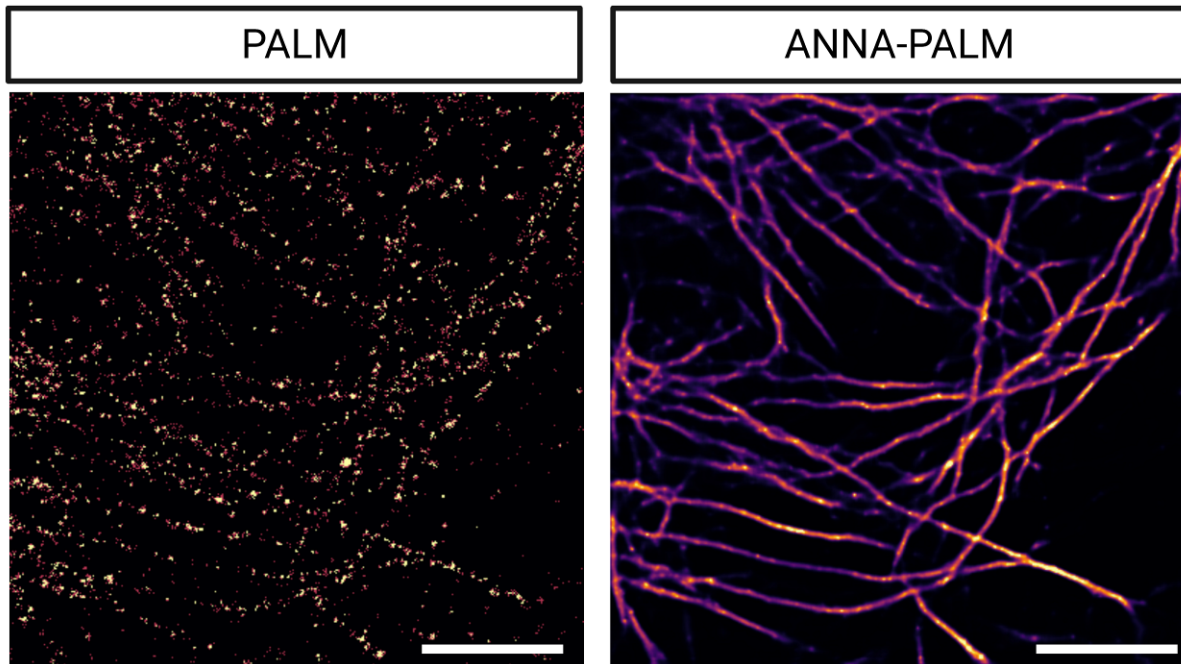

**Figure S18.** SMLM image of microtubules reconstructed after an acquisition time of 83.3 min at 100 ms exposure time using solely 640 nm irradiation at an intensity of  $1 \text{ kW cm}^{-2}$ . The left image shows the raw reconstructed PALM-like, i.e., Cy5 is photoactivated via phototruncation  $\text{Cy7} \rightarrow \text{Cy5}$  followed by detection, localization, and photobleaching or further photoconversion. SMLM image obtained after applying a trained artificial neural network (ANNA-PALM) algorithm to the reconstructed raw PALM image. Scale bars:  $2 \mu\text{m}$ .

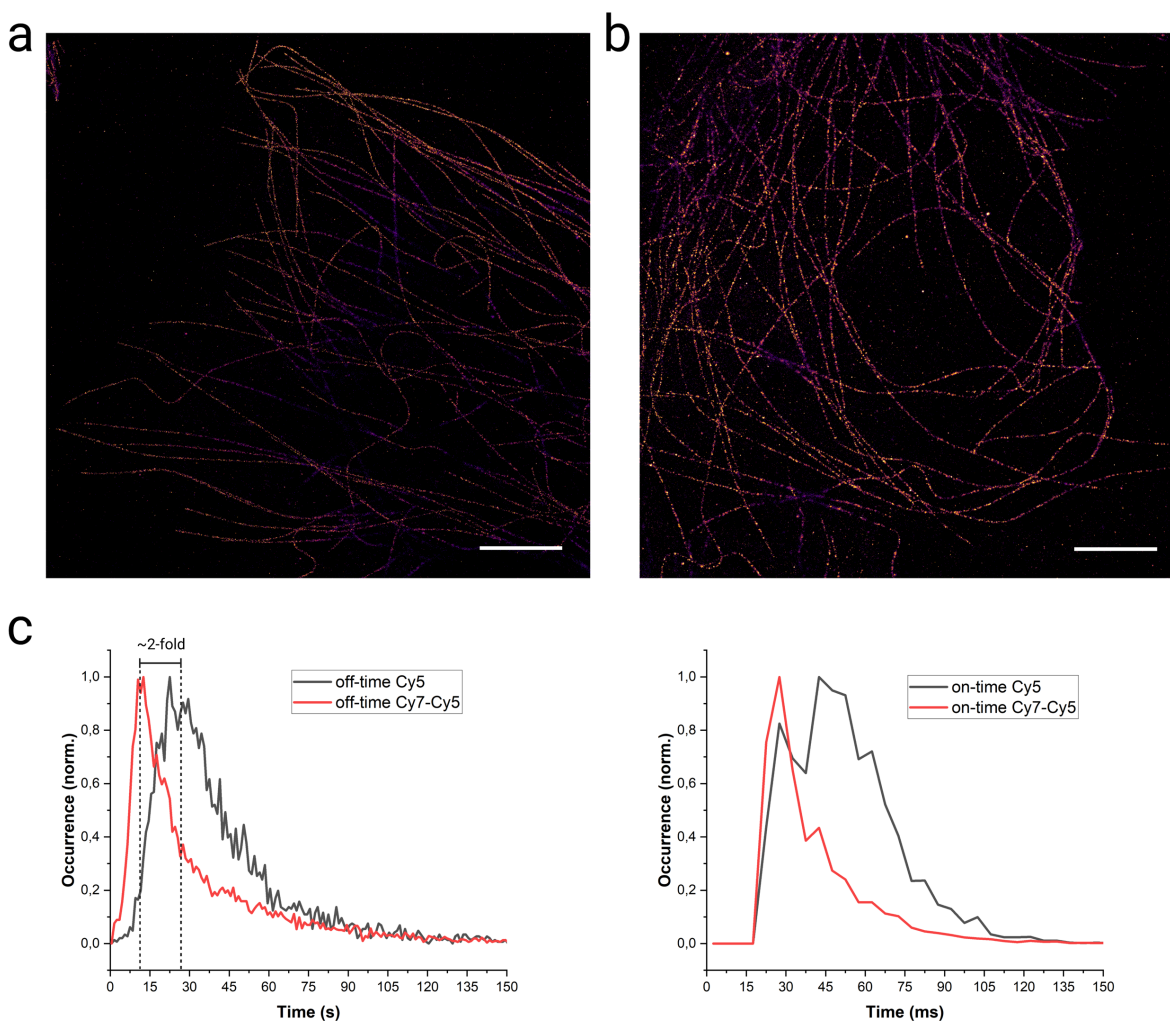

**Figure S19.** On- and off-times of conventional Cy5 and Cy7-Cy5 phototruncation DNA-PAINT. a,b DNA-PAINT images of immunostained microtubules in COS7 using docking strand labeled secondary  $\alpha$ -tubulin antibodies. Irradiation was performed at 640 nm in TIRF-mode using an irradiation intensity of  $0.5 \text{ kW cm}^{-2}$ . The Cy5 fluorescence signal was detected behind a bandpass filter ( $679 \text{ nm} \pm 21 \text{ nm}$ ). (a) Image of Cy5 signals measured with 100 pM Cy5 labeled imager strands in 500 mM NaCl, pH 7.4, measured at  $20 \text{ ms frame}^{-1}$ . (b) Image of Cy5 signals measured with 100 nM Cy7 labeled imager strand in PBS, 500 mM NaCl + 10 mM histidine, pH 7.4, measured at  $20 \text{ ms frame}^{-1}$ . (c) Histograms of off-times (binning 1s) and on-times (signal capturing on-times recorded at a binning of 5 ms) determined from conventional Cy5 and Cy7-Cy5 phototruncation DNA-PAINT. Scale bars:  $5 \mu\text{m}$ . The off-times of 100 nM Cy7-imager strands are  $\sim 2.2$ -fold shorter than the off-times measured for 100 pM Cy5 imager strands reducing the imaging time by the same factor.



## General experimental

Unless stated otherwise, reactions were conducted in oven-dried glassware under an atmosphere of nitrogen or argon using anhydrous solvents (passed through activated alumina columns). All commercially obtained reagents were used as received. Flash column chromatography was performed using reversed phase (100 Å, 20-40-micron particle size) and silica on a CombiFlash® Rf 200i (Teledyne Isco, Inc.). High-Resolution ElectroSpray Ionization Mass Spectrometry High-resolution (HRESIMS) analysis was conducted on the 6530 Series accurate-mass Q-TOF LC/MS (Agilent Technologies, Inc., Santa Clara, CA) with an API-electrospray source using the Zorbax 300SB-C18 Poroshell column 2.1x75 mm (particle size 5 µm) in positive ion mode. Runs employed a gradient of 0→95% MeCN/0.1% in aqueous formic acid over 4 minutes at a flow rate of 1 mL/min. <sup>1</sup>H NMR and <sup>13</sup>C NMR spectra were recorded on Bruker spectrometers (at 500 MHz or at 125 MHz) and are reported relative to deuterated solvent signals. Data for <sup>1</sup>H NMR spectra are reported as follows: chemical shift (δ ppm), multiplicity, coupling constant (Hz), and integration. Data for <sup>13</sup>C NMR spectra are reported in terms of chemical shift. Absorption curves for quantum yield measurements were performed on a BioTek's Synergy™ Mx Microplate Reader operated by Gen5™ 2.05 software. Fluorescence traces were recorded on a PTI QuantaMaster steady state spectrofluorometer operated by FelixGX 4.2.2 software, with 5 nm excitation and emission slit widths, 0.1 s integration rate, and enabled emission correction. Data analysis and curve fitting were performed using MS Excel 2011 and GraphPad Prism 7. Light intensity measurements were performed with a Thorlabs PM200 optical power and energy meter fitted with an S120VC standard Si photodiode power sensor (200 – 1100 nm, 50 nW – 50 mW).

## Synthesis and NMR analysis

Compound **23** was synthesized according to the previously reported procedure.<sup>1</sup>

### Synthesis of **22**:

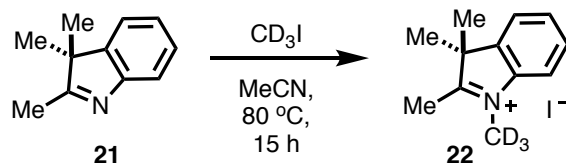

Iodomethane- $\text{d}_3$  (1.36 g, 9.43 mmol, 1.5 eq.) was added to a solution of **21** (1 g, 6.29 mmol, 1 eq.) in dry MeCN (5 mL) under  $\text{N}_2$ . The reaction mixture was heated to  $50\text{ }^\circ\text{C}$  for 15 h and the progress was monitored by LC-MS. Upon completion, the reaction mixture was precipitated in 50 mL diethyl ether. The precipitate was filtrated and washed (3 x 50 mL) and dried in vacuo to result in 1.64 g (86%) of **22** as a pale-red colored amorphous solid. The dried precipitate was taken forwarded without any further purification. HRESIMS calculated for  $\text{C}_{12}\text{H}_{13}\text{D}_3\text{N}^+$  ( $\text{M}$ )<sup>+</sup> 177.1466, observed 177.14671.

### Synthesis of **2-d<sub>3</sub>**:

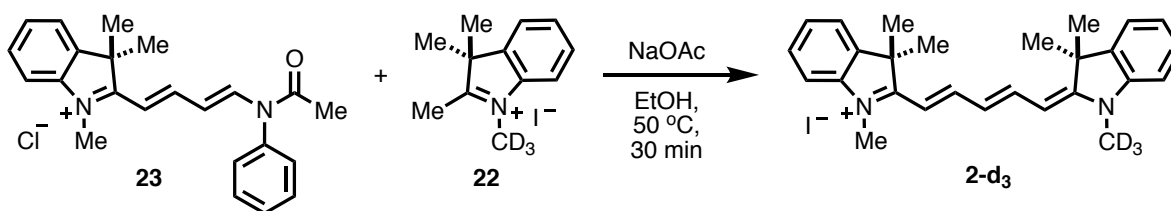

A solution of **23** (0.1 g, 0.26 mmol, 1.0 eq), **22** (64 mg, 0.21 mmol, 0.8 eq), and NaOAc (25.8 mg, 0.32 mmol, 1.2 eq) in EtOH (2.5 mL, 0.11 M) was heated to  $50\text{ }^\circ\text{C}$  for 30 min. The reaction progress was monitored by LC-MS and upon completion, cooled to room temperature and filtered through a celite plug. The filtrate was concentrated under reduced pressure and purified by normal-phase column chromatography (24 g silica gel column, 0-10% MeOH/ $\text{CH}_2\text{Cl}_2$ ) and concentrated in vacuo to yield **2-d<sub>3</sub>** (113 mg, 84%) as a bluish-green amorphous solid.  $^1\text{H}$  NMR (500 MHz, MeOD)  $\delta$  8.29 – 8.21 (m, 2H), 7.48 (d,  $J = 8.1$  Hz, 2H), 7.40 (td,  $J = 7.7, 1.3$  Hz, 2H), 7.31 – 7.22 (m, 4H), 6.63 (t,  $J = 12.4$  Hz, 1H), 6.27 (d,  $J = 13.7$  Hz, 2H), 3.62 (s, 3H), 1.72 (s, 12H).  $^{13}\text{C}$  NMR (125 MHz, MeOD)  $\delta$  175.35, 175.24, 155.55, 155.50, 144.27, 144.25, 142.53, 142.50, 129.70, 126.62, 126.20, 126.17, 123.28, 111.80, 111.78, 104.34, 104.30, 50.50, 50.46, 31.54, 30.69, 27.83, 27.81. HRESIMS calculated for  $\text{C}_{27}\text{H}_{28}\text{D}_3\text{N}_2$  ( $\text{M}$ )<sup>+</sup> 386.2670, observed 386.2676.

### Synthesis of 2-d<sub>6</sub>:

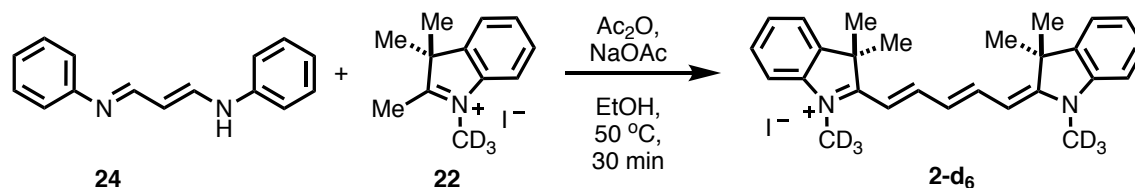

To a solution of **22** (0.15 g, 0.49 mmol, 1 eq), **24** (44 mg, 0.20 mmol, 0.4 eq), and NaOAc (45 mg, 0.54 mmol, 1.1 eq) in EtOH (2.5 mL, 0.34 M) was added Ac<sub>2</sub>O (55 mg, 0.54 mmol, 1.1 eq). The reaction mixture was heated to 50 °C for 60 min. The reaction progress was monitored by LC-MS and upon completion, cooled to room temperature and filtered through a celite plug. The filtrate was concentrated under reduced pressure and purified by normal-phase column chromatography (24 g silica gel column, 0-10% MeOH/CH<sub>2</sub>Cl<sub>2</sub>) and concentrated in vacuo to yield **2-d<sub>6</sub>** (232 mg, 91%) as a bluish-green amorphous solid. <sup>1</sup>H NMR (400 MHz, MeOD) δ 8.29 – 8.17 (m, 2H), 7.46 (d, J = 7.3 Hz, 2H), 7.38 (td, J = 7.5, 1.2 Hz, 2H), 7.31 – 7.19 (m, 4H), 6.64 (t, J = 12.4 Hz, 1H), 6.27 (d, J = 13.8 Hz, 2H), 5.48 (s, 1H), 1.70 (s, 12H). <sup>13</sup>C NMR (100 MHz, MeOD) δ 175.26, 155.43, 144.23, 142.53, 129.66, 126.64, 126.15, 123.27, 111.78, 104.36, 54.84, 50.47, 27.87. HRESIMS calculated for C<sub>27</sub>H<sub>25</sub>D<sub>6</sub>N<sub>2</sub> (M)<sup>+</sup> 389.2858, observed 389.2861.

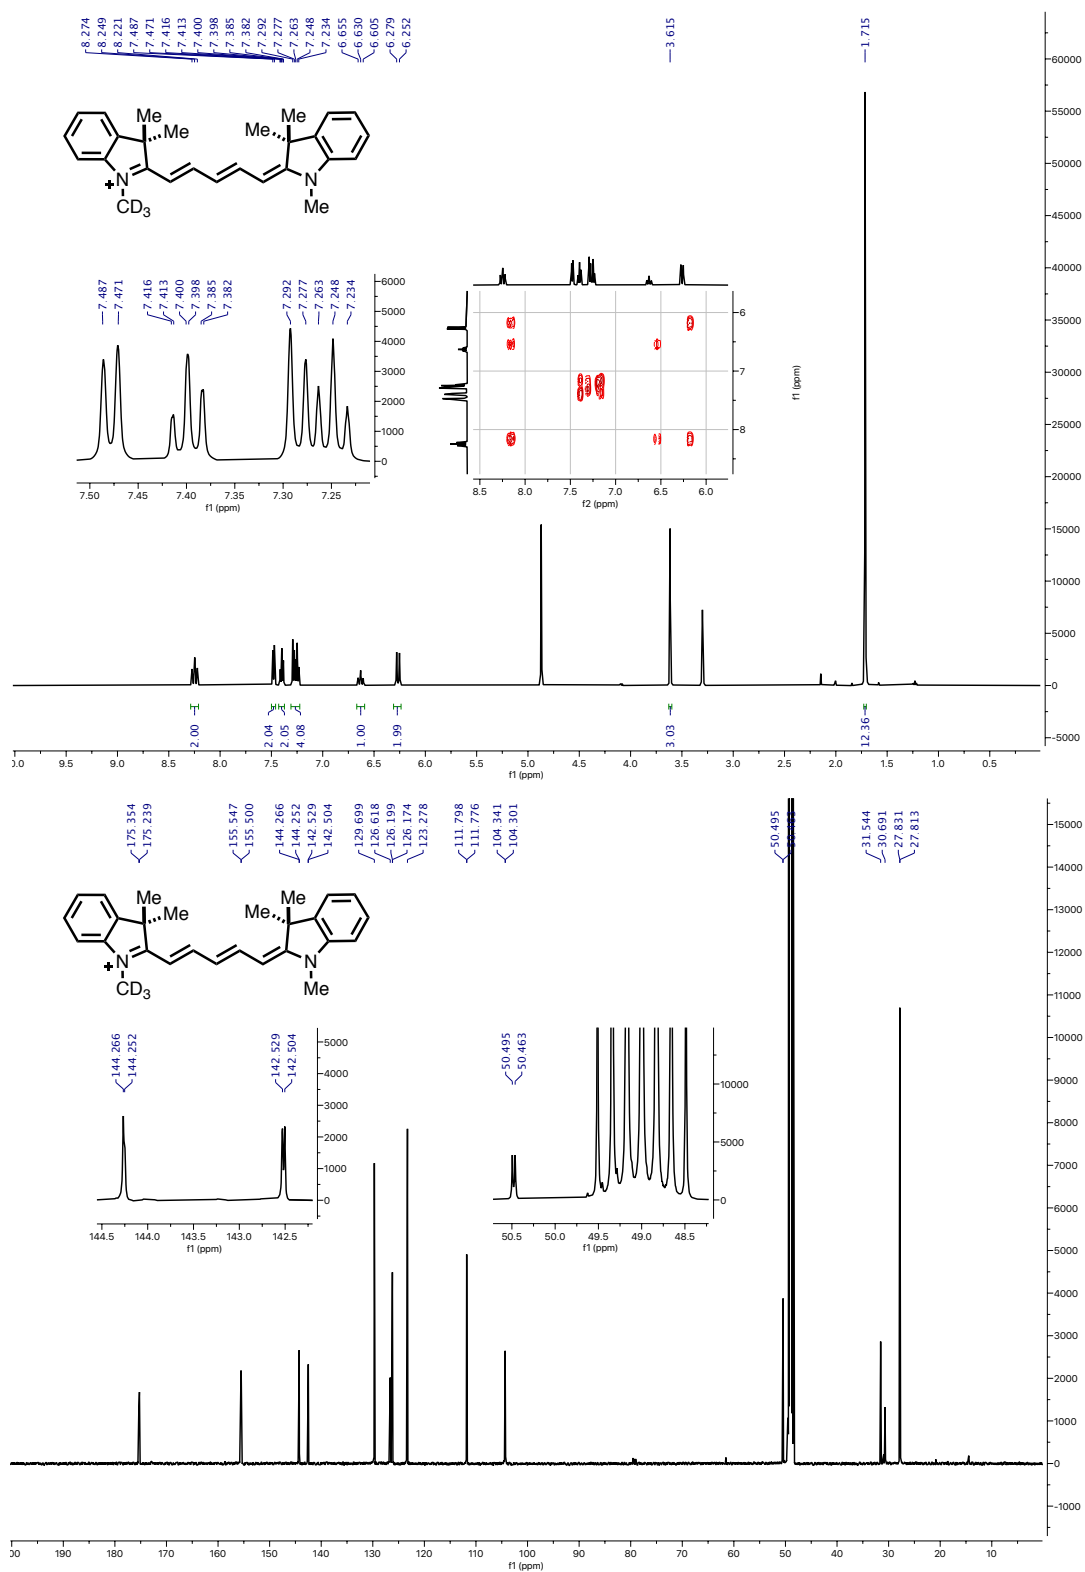

<sup>1</sup>H NMR (500 MHz) and <sup>13</sup>C (125 MHz) of 2-d<sub>3</sub>.

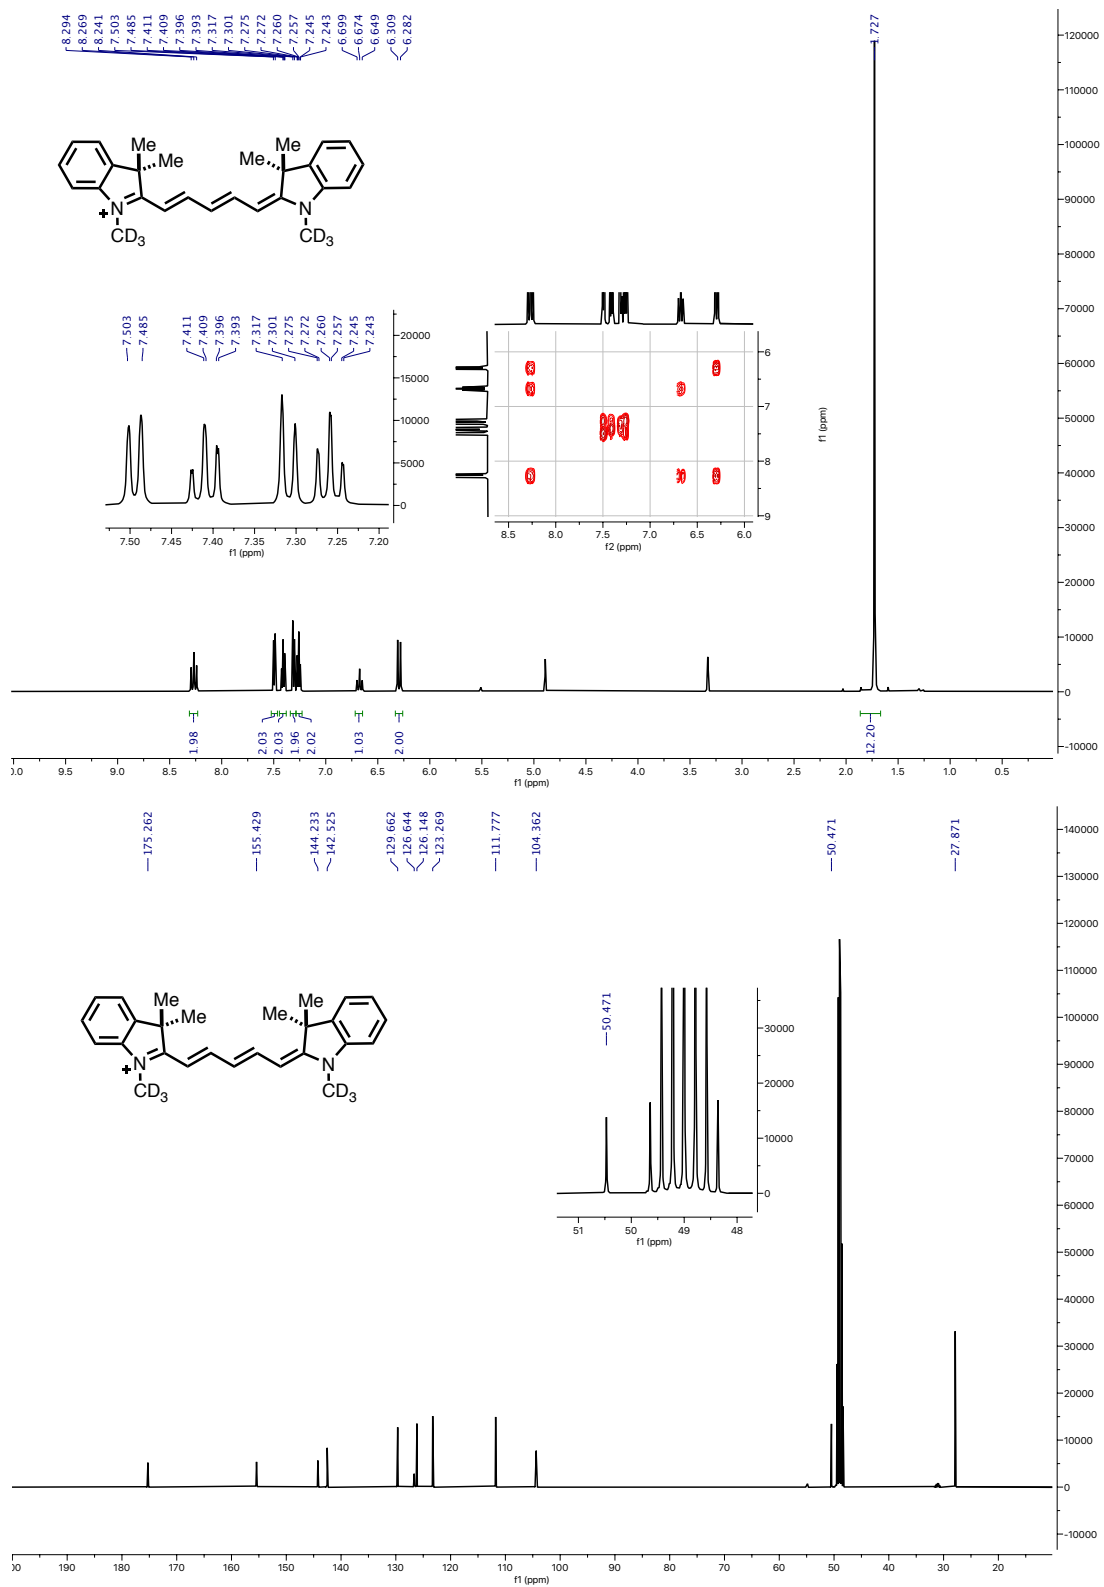

**<sup>1</sup>H NMR (400 MHz) and <sup>13</sup>C (100 MHz) NMR of 2-d<sub>6</sub>.**

## Computational analysis

DFT calculations show the peroxy intermediate **9** to exist as a minimum on the potential energy surface. This peroxy intermediate is unlike the reaction of  $^1\text{O}_2$  with simple alkenes that typically react via a two-step no-intermediate mechanism, in which perepoxides reside on an upper caldera segment of the potential energy surfaces. Dienes and polyenes with no allylic hydrogens can undergo alternate pathways, including formation of peroxy intermediates that are rationalized to be zwitterionic due to their capacity to react with nucleophilic solvents such as methanol.<sup>2-5</sup>

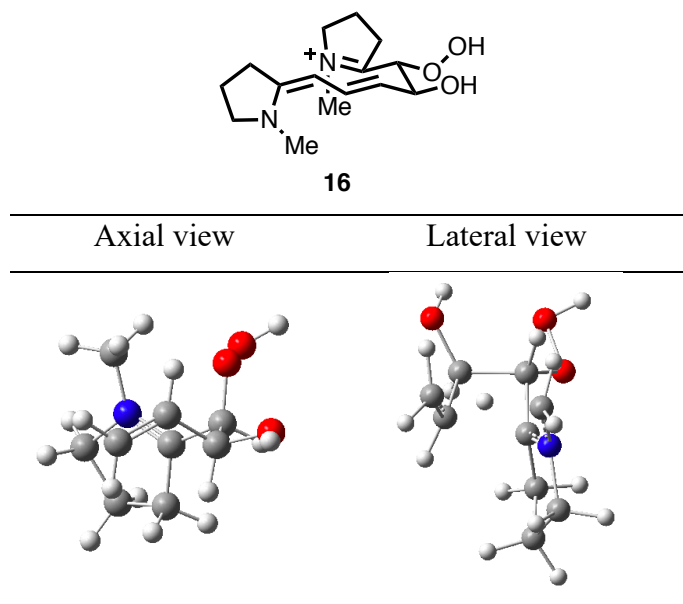

Axial and lateral view of **16** adopting a chair-like structure, which enable the intramolecular attack of the vinylogous enamine

## Descriptions of energies and geometries of stationary points

### 2 (pentamethine cyanine)

|                                              |                             |
|----------------------------------------------|-----------------------------|
| Zero-point correction=                       | 0.520957 (Hartree/Particle) |
| Thermal correction to Energy=                | 0.548917                    |
| Thermal correction to Enthalpy=              | 0.549862                    |
| Thermal correction to Gibbs Free Energy=     | 0.461639                    |
| Sum of electronic and zero-point Energies=   | -1155.849879                |
| Sum of electronic and thermal Energies=      | -1155.821919                |
| Sum of electronic and thermal Enthalpies=    | -1155.820975                |
| Sum of electronic and thermal Free Energies= | -1155.909197                |

|       | E (Thermal)<br>KCal/Mol | CV<br>Cal/Mol-Kelvin | S<br>Cal/Mol-Kelvin |
|-------|-------------------------|----------------------|---------------------|
| Total | 344.451                 | 109.040              | 185.679             |

|    |    |   |   |           |            |           |
|----|----|---|---|-----------|------------|-----------|
| +1 | 1  | 6 | 0 | -1.565446 | -4.332102  | 0.992063  |
|    | 2  | 6 | 0 | -1.462812 | -4.119787  | -0.379662 |
|    | 3  | 6 | 0 | -0.711542 | -3.062941  | -0.863025 |
|    | 4  | 6 | 0 | -0.067590 | -2.226501  | 0.052174  |
|    | 5  | 6 | 0 | -0.181517 | -2.454462  | 1.422460  |
|    | 6  | 6 | 0 | -0.936487 | -3.517125  | 1.921335  |
|    | 7  | 6 | 0 | -2.815517 | -5.997865  | 0.049845  |
|    | 8  | 1 | 0 | -0.621819 | -2.883890  | -1.930690 |
|    | 9  | 1 | 0 | 0.525948  | -1.392833  | -0.305447 |
|    | 10 | 1 | 0 | 0.324617  | -1.795607  | 2.119268  |
|    | 11 | 1 | 0 | -1.014275 | -3.679621  | 2.990032  |
|    | 12 | 6 | 0 | -2.260454 | -5.175889  | -1.115406 |
|    | 13 | 6 | 0 | -1.327189 | -6.014859  | -2.007072 |
|    | 14 | 1 | 0 | -1.868372 | -6.796631  | -2.543843 |
|    | 15 | 1 | 0 | -0.854154 | -5.360563  | -2.744087 |
|    | 16 | 1 | 0 | -0.540015 | -6.483943  | -1.412371 |
|    | 17 | 6 | 0 | -3.386203 | -4.512801  | -1.929765 |
|    | 18 | 1 | 0 | -2.943600 | -3.835452  | -2.664860 |
|    | 19 | 1 | 0 | -3.991031 | -5.247301  | -2.465267 |
|    | 20 | 1 | 0 | -4.043348 | -3.929434  | -1.280769 |
|    | 21 | 7 | 0 | -2.383784 | -5.466031  | 1.207645  |
|    | 22 | 6 | 0 | -2.718342 | -5.993748  | 2.518940  |
|    | 23 | 1 | 0 | -2.245860 | -5.380885  | 3.282497  |
|    | 24 | 1 | 0 | -3.800879 | -5.973107  | 2.668202  |
|    | 25 | 1 | 0 | -2.356800 | -7.020689  | 2.615357  |
|    | 26 | 6 | 0 | -3.636102 | -7.123461  | 0.014247  |
|    | 27 | 1 | 0 | -3.924432 | -7.571909  | 0.959949  |
|    | 28 | 6 | 0 | -4.120923 | -7.725551  | -1.145386 |
|    | 29 | 1 | 0 | -3.852697 | -7.302390  | -2.110585 |
|    | 30 | 6 | 0 | -4.939380 | -8.850478  | -1.162952 |
|    | 31 | 1 | 0 | -5.232129 | -9.307334  | -0.220155 |
|    | 32 | 6 | 0 | -5.393313 | -9.406375  | -2.354799 |
|    | 33 | 1 | 0 | -5.076659 | -8.917196  | -3.273021 |
|    | 34 | 6 | 0 | -6.213139 | -10.530500 | -2.436302 |
|    | 35 | 1 | 0 | -6.509547 | -10.993203 | -1.500002 |
|    | 36 | 6 | 0 | -6.677520 | -11.100004 | -3.620172 |
|    | 37 | 6 | 0 | -7.210194 | -11.698668 | -5.833688 |
|    | 38 | 6 | 0 | -7.811020 | -12.581729 | -4.941162 |
|    | 39 | 7 | 0 | -7.467157 | -12.189154 | -3.626026 |
|    | 40 | 6 | 0 | -7.911585 | -12.877137 | -2.426439 |
|    | 41 | 1 | 0 | -8.502137 | -12.202331 | -1.801498 |
|    | 42 | 1 | 0 | -8.528724 | -13.726361 | -2.708931 |
|    | 43 | 1 | 0 | -7.050308 | -13.238956 | -1.859162 |
|    | 44 | 6 | 0 | -6.422040 | -10.660212 | -5.063431 |

|    |   |   |           |            |           |
|----|---|---|-----------|------------|-----------|
| 45 | 6 | 0 | -4.929564 | -10.754244 | -5.429117 |
| 46 | 1 | 0 | -4.810924 | -10.558643 | -6.498090 |
| 47 | 1 | 0 | -4.327648 | -10.026413 | -4.881350 |
| 48 | 1 | 0 | -4.540649 | -11.753439 | -5.220008 |
| 49 | 6 | 0 | -6.991103 | -9.256470  | -5.338084 |
| 50 | 1 | 0 | -8.047825 | -9.205616  | -5.065851 |
| 51 | 1 | 0 | -6.453633 | -8.482397  | -4.786702 |
| 52 | 1 | 0 | -6.902714 | -9.037811  | -6.405521 |
| 53 | 6 | 0 | -7.389218 | -11.861616 | -7.196156 |
| 54 | 1 | 0 | -6.926884 | -11.181003 | -7.905427 |
| 55 | 6 | 0 | -8.599814 | -13.642794 | -5.359937 |
| 56 | 1 | 0 | -9.069555 | -14.331862 | -4.667755 |
| 57 | 6 | 0 | -8.773349 | -13.797454 | -6.736163 |
| 58 | 6 | 0 | -8.179290 | -12.923058 | -7.644600 |
| 59 | 1 | 0 | -8.332358 | -13.068637 | -8.707878 |
| 60 | 1 | 0 | -9.383743 | -14.616047 | -7.101055 |

### 3 (trimethine cyanine)

|                                              |                             |
|----------------------------------------------|-----------------------------|
| Zero-point correction=                       | 0.487034 (Hartree/Particle) |
| Thermal correction to Energy=                | 0.512886                    |
| Thermal correction to Enthalpy=              | 0.513830                    |
| Thermal correction to Gibbs Free Energy=     | 0.430867                    |
| Sum of electronic and zero-point Energies=   | -1078.512163                |
| Sum of electronic and thermal Energies=      | -1078.486312                |
| Sum of electronic and thermal Enthalpies=    | -1078.485368                |
| Sum of electronic and thermal Free Energies= | -1078.568331                |

|       | E (Thermal) | CV             | S              |
|-------|-------------|----------------|----------------|
|       | KCal/Mol    | Cal/Mol-Kelvin | Cal/Mol-Kelvin |
| Total | 321.841     | 101.107        | 174.610        |

+1 1

|    |   |   |           |           |           |
|----|---|---|-----------|-----------|-----------|
| 1  | 6 | 0 | -1.924390 | -5.205840 | 0.224475  |
| 2  | 6 | 0 | -1.869236 | -4.990150 | -1.148891 |
| 3  | 6 | 0 | -1.095480 | -3.962119 | -1.658593 |
| 4  | 6 | 0 | -0.381121 | -3.158723 | -0.766542 |
| 5  | 6 | 0 | -0.448244 | -3.390003 | 0.606383  |
| 6  | 6 | 0 | -1.225341 | -4.423772 | 1.131301  |
| 7  | 6 | 0 | -3.277371 | -6.815241 | -0.671423 |
| 8  | 1 | 0 | -1.041378 | -3.780334 | -2.728165 |
| 9  | 1 | 0 | 0.231354  | -2.348004 | -1.144380 |
| 10 | 1 | 0 | 0.112975  | -2.756873 | 1.284508  |
| 11 | 1 | 0 | -1.265418 | -4.589688 | 2.201526  |
| 12 | 6 | 0 | -2.737228 | -6.009923 | -1.855539 |
| 13 | 6 | 0 | -1.874412 | -6.881572 | -2.785558 |



|    |   |   |           |            |           |
|----|---|---|-----------|------------|-----------|
| 14 | 1 | 0 | -2.469194 | -7.636684  | -3.304489 |
| 15 | 1 | 0 | -1.403958 | -6.244141  | -3.538613 |
| 16 | 1 | 0 | -1.085322 | -7.387646  | -2.224814 |
| 17 | 6 | 0 | -3.865968 | -5.299246  | -2.623738 |
| 18 | 1 | 0 | -3.425637 | -4.629432  | -3.366841 |
| 19 | 1 | 0 | -4.512021 | -6.006884  | -3.148253 |
| 20 | 1 | 0 | -4.482279 | -4.701898  | -1.948088 |
| 21 | 7 | 0 | -2.780044 | -6.308267  | 0.468049  |
| 22 | 6 | 0 | -3.081973 | -6.828075  | 1.791279  |
| 23 | 1 | 0 | -2.745980 | -7.864684  | 1.874865  |
| 24 | 1 | 0 | -2.565422 | -6.228988  | 2.536898  |
| 25 | 1 | 0 | -4.157215 | -6.775784  | 1.979037  |
| 26 | 6 | 0 | -4.142090 | -7.910707  | -0.677656 |
| 27 | 1 | 0 | -4.404073 | -8.356119  | 0.277095  |
| 28 | 6 | 0 | -4.697690 | -8.480433  | -1.820033 |
| 29 | 1 | 0 | -4.450261 | -8.047812  | -2.781912 |
| 30 | 6 | 0 | -5.554781 | -9.577154  | -1.790908 |
| 31 | 1 | 0 | -5.788460 | -9.999208  | -0.818362 |
| 32 | 6 | 0 | -6.132822 | -10.168626 | -2.915121 |
| 33 | 6 | 0 | -6.870446 | -10.812534 | -5.055940 |
| 34 | 6 | 0 | -7.416533 | -11.650865 | -4.089111 |
| 35 | 7 | 0 | -6.947694 | -11.231470 | -2.819846 |
| 36 | 6 | 0 | -7.305856 | -11.874035 | -1.566419 |
| 37 | 1 | 0 | -7.833639 | -11.169659 | -0.918539 |
| 38 | 1 | 0 | -7.956762 | -12.720086 | -1.771915 |
| 39 | 1 | 0 | -6.407502 | -12.234671 | -1.059485 |
| 40 | 6 | 0 | -5.990837 | -9.776839  | -4.387824 |
| 41 | 6 | 0 | -4.539274 | -9.922782  | -4.878674 |
| 42 | 1 | 0 | -4.510898 | -9.768677  | -5.960428 |
| 43 | 1 | 0 | -3.875385 | -9.189138  | -4.415740 |
| 44 | 1 | 0 | -4.153735 | -10.922400 | -4.665811 |
| 45 | 6 | 0 | -6.544515 | -8.365476  | -4.653661 |
| 46 | 1 | 0 | -7.570983 | -8.274583  | -4.291296 |
| 47 | 1 | 0 | -5.938786 | -7.592659  | -4.174945 |
| 48 | 1 | 0 | -6.544171 | -8.178019  | -5.730518 |
| 49 | 6 | 0 | -7.171126 | -11.007893 | -6.392632 |
| 50 | 1 | 0 | -6.753230 | -10.362506 | -7.159962 |
| 51 | 6 | 0 | -8.269207 | -12.697764 | -4.404676 |
| 52 | 1 | 0 | -8.697567 | -13.351491 | -3.653902 |
| 53 | 6 | 0 | -8.565703 | -12.885552 | -5.755535 |
| 54 | 6 | 0 | -8.027375 | -12.056234 | -6.738078 |
| 55 | 1 | 0 | -8.276310 | -12.227006 | -7.779222 |
| 56 | 1 | 0 | -9.229162 | -13.694149 | -6.041309 |

9

Zero-point correction=

0.527803 (Hartree/Particle)

|                                              |              |
|----------------------------------------------|--------------|
| Thermal correction to Energy=                | 0.557735     |
| Thermal correction to Enthalpy=              | 0.558679     |
| Thermal correction to Gibbs Free Energy=     | 0.465551     |
| Sum of electronic and zero-point Energies=   | -1306.030039 |
| Sum of electronic and thermal Energies=      | -1306.000107 |
| Sum of electronic and thermal Enthalpies=    | -1305.999163 |
| Sum of electronic and thermal Free Energies= | -1306.092292 |

|       | E (Thermal) | CV             | S              |
|-------|-------------|----------------|----------------|
|       | KCal/Mol    | Cal/Mol-Kelvin | Cal/Mol-Kelvin |
| Total | 349.984     | 115.922        | 196.005        |

+1 1

|    |   |   |           |            |           |
|----|---|---|-----------|------------|-----------|
| 1  | 6 | 0 | -1.494150 | -4.383126  | 1.454640  |
| 2  | 6 | 0 | -1.690473 | -3.786523  | 0.215302  |
| 3  | 6 | 0 | -1.311960 | -2.467957  | 0.023211  |
| 4  | 6 | 0 | -0.745240 | -1.781389  | 1.099685  |
| 5  | 6 | 0 | -0.562791 | -2.401901  | 2.336986  |
| 6  | 6 | 0 | -0.938949 | -3.729621  | 2.541549  |
| 7  | 6 | 0 | -2.437311 | -5.998990  | 0.198724  |
| 8  | 1 | 0 | -1.452177 | -1.974973  | -0.934094 |
| 9  | 1 | 0 | -0.443180 | -0.747550  | 0.974370  |
| 10 | 1 | 0 | -0.122870 | -1.843617  | 3.155572  |
| 11 | 1 | 0 | -0.804745 | -4.214923  | 3.501540  |
| 12 | 6 | 0 | -2.319870 | -4.798078  | -0.714818 |
| 13 | 6 | 0 | -1.397898 | -5.083169  | -1.916095 |
| 14 | 1 | 0 | -1.830953 | -5.818679  | -2.596427 |
| 15 | 1 | 0 | -1.255752 | -4.154167  | -2.473856 |
| 16 | 1 | 0 | -0.417762 | -5.436542  | -1.587720 |
| 17 | 6 | 0 | -3.726289 | -4.362369  | -1.169263 |
| 18 | 1 | 0 | -3.640095 | -3.445602  | -1.758013 |
| 19 | 1 | 0 | -4.194501 | -5.130086  | -1.790310 |
| 20 | 1 | 0 | -4.372551 | -4.165456  | -0.311077 |
| 21 | 7 | 0 | -1.970109 | -5.727181  | 1.383881  |
| 22 | 6 | 0 | -1.942530 | -6.618544  | 2.555984  |
| 23 | 1 | 0 | -0.923767 | -6.598915  | 2.948004  |
| 24 | 1 | 0 | -2.631236 | -6.202903  | 3.294602  |
| 25 | 1 | 0 | -2.282822 | -7.633955  | 2.303180  |
| 26 | 6 | 0 | -3.633765 | -7.727518  | -1.365482 |
| 27 | 1 | 0 | -3.280152 | -7.297057  | -2.301584 |
| 28 | 6 | 0 | -4.572262 | -8.695848  | -1.346639 |
| 29 | 1 | 0 | -4.815934 | -9.125117  | -0.370839 |
| 30 | 6 | 0 | -5.164907 | -9.214380  | -2.540336 |
| 31 | 1 | 0 | -4.863319 | -8.775788  | -3.488865 |
| 32 | 6 | 0 | -6.070821 | -10.236220 | -2.502143 |
| 33 | 1 | 0 | -6.327620 | -10.628141 | -1.522918 |

|    |   |   |            |            |           |
|----|---|---|------------|------------|-----------|
| 34 | 6 | 0 | -6.697205  | -10.823575 | -3.632198 |
| 35 | 6 | 0 | -7.496324  | -11.446467 | -5.746793 |
| 36 | 6 | 0 | -8.069152  | -12.244661 | -4.762531 |
| 37 | 7 | 0 | -7.549252  | -11.832837 | -3.504649 |
| 38 | 6 | 0 | -7.920740  | -12.454126 | -2.235697 |
| 39 | 1 | 0 | -8.474744  | -11.743457 | -1.619131 |
| 40 | 1 | 0 | -8.546324  | -13.319429 | -2.437168 |
| 41 | 1 | 0 | -7.023419  | -12.781813 | -1.708671 |
| 42 | 6 | 0 | -6.551561  | -10.456519 | -5.104092 |
| 43 | 6 | 0 | -5.112023  | -10.693580 | -5.601585 |
| 44 | 1 | 0 | -5.084681  | -10.543400 | -6.683670 |
| 45 | 1 | 0 | -4.404090  | -10.001037 | -5.143019 |
| 46 | 1 | 0 | -4.787898  | -11.715083 | -5.390169 |
| 47 | 6 | 0 | -7.021172  | -9.014115  | -5.373320 |
| 48 | 1 | 0 | -8.037815  | -8.858134  | -5.005391 |
| 49 | 1 | 0 | -6.363966  | -8.279830  | -4.904096 |
| 50 | 1 | 0 | -7.016908  | -8.837128  | -6.451695 |
| 51 | 6 | 0 | -7.832644  | -11.642265 | -7.075757 |
| 52 | 1 | 0 | -7.396563  | -11.031171 | -7.860414 |
| 53 | 6 | 0 | -8.984771  | -13.247921 | -5.042063 |
| 54 | 1 | 0 | -9.435293  | -13.864976 | -4.273645 |
| 55 | 6 | 0 | -9.316273  | -13.435233 | -6.383568 |
| 56 | 6 | 0 | -8.750564  | -12.647259 | -7.386740 |
| 57 | 1 | 0 | -9.029241  | -12.818237 | -8.420385 |
| 58 | 1 | 0 | -10.028544 | -14.208681 | -6.647640 |
| 59 | 8 | 0 | -3.960856  | -7.560930  | 0.975569  |
| 60 | 8 | 0 | -3.669731  | -8.892618  | 1.491273  |
| 61 | 6 | 0 | -3.035931  | -7.362233  | -0.031433 |
| 62 | 1 | 0 | -2.208023  | -8.081451  | 0.138275  |

## 15

|                                              |                             |
|----------------------------------------------|-----------------------------|
| Zero-point correction=                       | 0.486703 (Hartree/Particle) |
| Thermal correction to Energy=                | 0.511943                    |
| Thermal correction to Enthalpy=              | 0.512887                    |
| Thermal correction to Gibbs Free Energy=     | 0.432614                    |
| Sum of electronic and zero-point Energies=   | -1078.473152                |
| Sum of electronic and thermal Energies=      | -1078.447912                |
| Sum of electronic and thermal Enthalpies=    | -1078.446967                |
| Sum of electronic and thermal Free Energies= | -1078.527240                |

|       | E (Thermal) | CV             | S              |
|-------|-------------|----------------|----------------|
|       | KCal/Mol    | Cal/Mol-Kelvin | Cal/Mol-Kelvin |
| Total | 321.249     | 101.069        | 168.949        |

|      |   |   |           |           |          |
|------|---|---|-----------|-----------|----------|
| +1 1 |   |   |           |           |          |
| 1    | 6 | 0 | -4.807876 | -7.773333 | 2.817738 |

|    |   |   |           |            |           |
|----|---|---|-----------|------------|-----------|
| 2  | 6 | 0 | -4.350522 | -6.752774  | 1.996824  |
| 3  | 6 | 0 | -3.508658 | -5.783966  | 2.519094  |
| 4  | 6 | 0 | -3.164962 | -5.868168  | 3.870014  |
| 5  | 6 | 0 | -3.641820 | -6.904624  | 4.675560  |
| 6  | 6 | 0 | -4.481644 | -7.890859  | 4.158973  |
| 7  | 6 | 0 | -5.777236 | -8.181245  | 0.808818  |
| 8  | 1 | 0 | -3.128831 | -4.975848  | 1.901519  |
| 9  | 1 | 0 | -2.516578 | -5.114936  | 4.303438  |
| 10 | 1 | 0 | -3.358496 | -6.944183  | 5.721111  |
| 11 | 1 | 0 | -4.857583 | -8.691876  | 4.785595  |
| 12 | 6 | 0 | -4.868435 | -6.978642  | 0.595627  |
| 13 | 6 | 0 | -3.662049 | -7.339414  | -0.309171 |
| 14 | 1 | 0 | -3.953636 | -7.481324  | -1.348451 |
| 15 | 1 | 0 | -2.950024 | -6.512135  | -0.260951 |
| 16 | 1 | 0 | -3.158993 | -8.242430  | 0.044770  |
| 17 | 6 | 0 | -5.658809 | -5.786492  | 0.035519  |
| 18 | 1 | 0 | -4.991000 | -4.926811  | -0.057552 |
| 19 | 1 | 0 | -6.064462 | -6.017476  | -0.952477 |
| 20 | 1 | 0 | -6.483253 | -5.513190  | 0.697779  |
| 21 | 7 | 0 | -5.658383 | -8.619462  | 2.038802  |
| 22 | 6 | 0 | -6.239087 | -9.821923  | 2.635775  |
| 23 | 1 | 0 | -5.439860 | -10.353964 | 3.154058  |
| 24 | 1 | 0 | -7.012229 | -9.538076  | 3.353067  |
| 25 | 1 | 0 | -6.666188 | -10.446034 | 1.855072  |
| 26 | 6 | 0 | -6.737084 | -8.725002  | -0.165800 |
| 27 | 6 | 0 | -6.317061 | -8.861344  | -1.559975 |
| 28 | 6 | 0 | -6.719721 | -9.805457  | -2.452163 |
| 29 | 6 | 0 | -7.164620 | -10.923850 | -4.482994 |
| 30 | 6 | 0 | -7.612666 | -11.686993 | -3.406967 |
| 31 | 7 | 0 | -7.312049 | -11.017107 | -2.198232 |
| 32 | 6 | 0 | -7.293204 | -11.690972 | -0.923777 |
| 33 | 1 | 0 | -8.148659 | -11.425660 | -0.288828 |
| 34 | 1 | 0 | -7.297461 | -12.767794 | -1.096106 |
| 35 | 1 | 0 | -6.372121 | -11.425302 | -0.394047 |
| 36 | 6 | 0 | -6.525711 | -9.653017  | -3.966915 |
| 37 | 6 | 0 | -5.031288 | -9.598366  | -4.320712 |
| 38 | 1 | 0 | -4.909738 | -9.573405  | -5.407123 |
| 39 | 1 | 0 | -4.565872 | -8.697239  | -3.908178 |
| 40 | 1 | 0 | -4.504260 | -10.474595 | -3.935846 |
| 41 | 6 | 0 | -7.250797 | -8.405257  | -4.487899 |
| 42 | 1 | 0 | -8.312539 | -8.433566  | -4.231629 |
| 43 | 1 | 0 | -6.812999 | -7.496898  | -4.062739 |
| 44 | 1 | 0 | -7.161238 | -8.350361  | -5.576331 |
| 45 | 6 | 0 | -7.334345 | -11.383403 | -5.776656 |
| 46 | 1 | 0 | -6.984364 | -10.799838 | -6.623695 |
| 47 | 6 | 0 | -8.249201 | -12.906404 | -3.579984 |

|    |   |   |           |            |           |
|----|---|---|-----------|------------|-----------|
| 48 | 1 | 0 | -8.620799 | -13.487556 | -2.743041 |
| 49 | 6 | 0 | -8.416037 | -13.360208 | -4.891031 |
| 50 | 6 | 0 | -7.966359 | -12.614395 | -5.977305 |
| 51 | 1 | 0 | -8.111903 | -12.988387 | -6.984332 |
| 52 | 1 | 0 | -8.911727 | -14.309879 | -5.060676 |
| 53 | 6 | 0 | -8.002166 | -8.927975  | 0.266197  |
| 54 | 1 | 0 | -8.299039 | -8.788788  | 1. 300130 |
| 55 | 1 | 0 | -8.781021 | -9.177326  | -0.446478 |
| 56 | 1 | 0 | -5.733886 | -8.050764  | -1.980167 |

## 16

|                                              |                             |
|----------------------------------------------|-----------------------------|
| Zero-point correction=                       | 0.397408 (Hartree/Particle) |
| Thermal correction to Energy=                | 0.418901                    |
| Thermal correction to Enthalpy=              | 0.419845                    |
| Thermal correction to Gibbs Free Energy=     | 0.346596                    |
| Sum of electronic and zero-point Energies=   | -920.703882                 |
| Sum of electronic and thermal Energies=      | -920.682388                 |
| Sum of electronic and thermal Enthalpies=    | -920.681444                 |
| Sum of electronic and thermal Free Energies= | -920.754693                 |

|       | E (Thermal) | CV             | S              |
|-------|-------------|----------------|----------------|
|       | Kcal/mol    | cal/mol-Kelvin | cal/mol-Kelvin |
| Total | 262.864     | 80.378         | 154.165        |

## 0 1

|    |   |   |           |           |           |
|----|---|---|-----------|-----------|-----------|
| 1  | 6 | 0 | -2.996353 | -0.439537 | -0.172917 |
| 2  | 6 | 0 | -2.195019 | -1.666910 | -0.701767 |
| 3  | 1 | 0 | -3.813357 | -0.787019 | 0.471996  |
| 4  | 1 | 0 | -2.894883 | -2.203170 | -1.355071 |
| 5  | 6 | 0 | -2.038623 | 0.461513  | 0.542237  |
| 6  | 6 | 0 | -1.402009 | 1.659059  | -0.092470 |
| 7  | 1 | 0 | -1.164870 | 1.467126  | -1.138949 |
| 8  | 1 | 0 | -2.136111 | 2.475390  | -0.060265 |
| 9  | 7 | 0 | -1.614798 | 0.285171  | 1.746460  |
| 10 | 6 | 0 | -0.178853 | 1.904340  | 0.804145  |
| 11 | 1 | 0 | 0.074938  | 2.959300  | 0.899154  |
| 12 | 1 | 0 | 0.679322  | 1.368992  | 0.387369  |
| 13 | 6 | 0 | -0.589052 | 1.284870  | 2.141943  |
| 14 | 1 | 0 | 0.215788  | 0.767891  | 2.668614  |
| 15 | 1 | 0 | -1.062987 | 1.992177  | 2.830507  |
| 16 | 8 | 0 | -1.906772 | -2.410433 | 0.465746  |
| 17 | 1 | 0 | -1.393022 | -3.184021 | 0.199584  |
| 18 | 8 | 0 | -3.497797 | 0.347450  | -1.231070 |
| 19 | 8 | 0 | -4.455981 | -0.464681 | -1.901308 |
| 20 | 1 | 0 | -5.222326 | 0.129423  | -1.911136 |

|    |   |   |           |           |           |
|----|---|---|-----------|-----------|-----------|
| 21 | 6 | 0 | 1.456668  | -0.725185 | -1.546736 |
| 22 | 1 | 0 | 1.375565  | -0.381514 | -2.573538 |
| 23 | 6 | 0 | 2.677000  | -0.742004 | -0.937690 |
| 24 | 6 | 0 | 5.013807  | -0.681904 | -0.710284 |
| 25 | 1 | 0 | 5.786971  | 0.085999  | -0.795993 |
| 26 | 1 | 0 | 5.436370  | -1.636405 | -1.056334 |
| 27 | 6 | 0 | 4.433294  | -0.798637 | 0.699923  |
| 28 | 1 | 0 | 4.416500  | 0.189013  | 1.167849  |
| 29 | 1 | 0 | 5.005628  | -1.472923 | 1.337293  |
| 30 | 6 | 0 | 2.998914  | -1.285223 | 0.441960  |
| 31 | 1 | 0 | 2.954222  | -2.379807 | 0.408851  |
| 32 | 1 | 0 | 2.290551  | -0.951416 | 1.204618  |
| 33 | 7 | 0 | 3.840661  | -0.313157 | -1.496249 |
| 34 | 6 | 0 | 3.944280  | 0.037261  | -2.893408 |
| 35 | 1 | 0 | 3.728710  | -0.820152 | -3.544377 |
| 36 | 1 | 0 | 3.241466  | 0.840935  | -3.132829 |
| 37 | 1 | 0 | 4.954282  | 0.393510  | -3.098130 |
| 38 | 6 | 0 | -2.044332 | -0.699287 | 2.739349  |
| 39 | 1 | 0 | -1.217782 | -1.386410 | 2.924864  |
| 40 | 1 | 0 | -2.295305 | -0.159637 | 3.654743  |
| 41 | 1 | 0 | -2.892068 | -1.270131 | 2.373269  |
| 42 | 6 | 0 | -0.968508 | -1.245164 | -1.461085 |
| 43 | 6 | 0 | 0.257066  | -1.191251 | -0.901621 |
| 44 | 1 | 0 | -1.122775 | -0.934077 | -2.491483 |
| 45 | 1 | 0 | 0.351186  | -1.529770 | 0.132966  |

## 17

|                                              |                             |
|----------------------------------------------|-----------------------------|
| Zero-point correction=                       | 0.394401 (Hartree/Particle) |
| Thermal correction to Energy=                | 0.414145                    |
| Thermal correction to Enthalpy=              | 0.415090                    |
| Thermal correction to Gibbs Free Energy=     | 0.346165                    |
| Sum of electronic and zero-point Energies=   | -920.657548                 |
| Sum of electronic and thermal Energies=      | -920.637803                 |
| Sum of electronic and thermal Enthalpies=    | -920.636859                 |
| Sum of electronic and thermal Free Energies= | -920.705783                 |

|       | E (Thermal) | CV             | S              |
|-------|-------------|----------------|----------------|
|       | Kcal/mol    | cal/mol-Kelvin | cal/mol-Kelvin |
| Total | 259.880     | 76.579         | 145.065        |

## 0 1

|   |   |   |           |           |           |
|---|---|---|-----------|-----------|-----------|
| 1 | 6 | 0 | -0.976275 | -0.481124 | -0.677430 |
| 2 | 6 | 0 | -3.042247 | -0.465772 | 0.076211  |
| 3 | 6 | 0 | -2.094475 | -1.537554 | -0.509155 |

|    |   |   |           |           |           |
|----|---|---|-----------|-----------|-----------|
| 4  | 1 | 0 | -0.862922 | -0.152840 | -1.712852 |
| 5  | 1 | 0 | -3.475420 | -0.717447 | 1.054599  |
| 6  | 1 | 0 | -2.461146 | -1.973260 | -1.442878 |
| 7  | 6 | 0 | -1.908788 | 0.588360  | 0.086525  |
| 8  | 6 | 0 | -2.162454 | 1.954969  | -0.541958 |
| 9  | 1 | 0 | -2.169544 | 1.909739  | -1.631214 |
| 10 | 1 | 0 | -3.142980 | 2.317965  | -0.218513 |
| 11 | 7 | 0 | -1.348748 | 0.899994  | 1.384212  |
| 12 | 6 | 0 | -0.820848 | -0.097297 | 2.092693  |
| 13 | 1 | 0 | -1.365899 | -1.039980 | 2.132949  |
| 14 | 1 | 0 | 0.139320  | -0.663307 | 1.155038  |
| 15 | 1 | 0 | -0.203068 | 0.170018  | 2.946491  |
| 16 | 6 | 0 | -1.039751 | 2.824596  | 0.036641  |
| 17 | 1 | 0 | -1.274710 | 3.889053  | 0.012300  |
| 18 | 1 | 0 | -0.111035 | 2.670024  | -0.518958 |
| 19 | 6 | 0 | -0.887207 | 2.303209  | 1.467671  |
| 20 | 1 | 0 | 0.136935  | 2.341807  | 1.845859  |
| 21 | 1 | 0 | -1.541789 | 2.836611  | 2.163667  |
| 22 | 8 | 0 | -1.705790 | -2.514594 | 0.426331  |
| 23 | 1 | 0 | -2.379544 | -3.204835 | 0.452656  |
| 24 | 8 | 0 | -4.019168 | -0.028015 | -0.829425 |
| 25 | 8 | 0 | -4.858430 | -1.164019 | -1.049679 |
| 26 | 1 | 0 | -5.730871 | -0.779352 | -0.875347 |
| 27 | 6 | 0 | 0.362418  | -0.795806 | -0.083597 |
| 28 | 1 | 0 | 0.562050  | -1.869860 | -0.048958 |
| 29 | 6 | 0 | 1.467636  | 0.068757  | -0.447454 |
| 30 | 1 | 0 | 1.245715  | 1.012790  | -0.933174 |
| 31 | 6 | 0 | 2.771030  | -0.290209 | -0.223205 |
| 32 | 6 | 0 | 5.112920  | -0.274071 | -0.363802 |
| 33 | 1 | 0 | 5.891150  | 0.404777  | -0.006623 |
| 34 | 1 | 0 | 5.442223  | -0.706149 | -1.318334 |
| 35 | 6 | 0 | 4.733971  | -1.351073 | 0.655437  |
| 36 | 1 | 0 | 4.859573  | -0.957450 | 1.666771  |
| 37 | 1 | 0 | 5.341306  | -2.250799 | 0.559356  |
| 38 | 6 | 0 | 3.244064  | -1.599545 | 0.370348  |
| 39 | 1 | 0 | 3.105514  | -2.390791 | -0.376128 |
| 40 | 1 | 0 | 2.677608  | -1.884362 | 1.259948  |
| 41 | 7 | 0 | 3.852537  | 0.449323  | -0.538509 |
| 42 | 6 | 0 | 3.772124  | 1.686364  | -1.281681 |
| 43 | 1 | 0 | 3.404195  | 1.519255  | -2.301330 |
| 44 | 1 | 0 | 3.098606  | 2.384876  | -0.775056 |
| 45 | 1 | 0 | 4.762598  | 2.138505  | -1.331462 |

|                                              |                             |
|----------------------------------------------|-----------------------------|
| Zero-point correction=                       | 0.397503 (Hartree/Particle) |
| Thermal correction to Energy=                | 0.418572                    |
| Thermal correction to Enthalpy=              | 0.419517                    |
| Thermal correction to Gibbs Free Energy=     | 0.346942                    |
| Sum of electronic and zero-point Energies=   | -920.686945                 |
| Sum of electronic and thermal Energies=      | -920.665875                 |
| Sum of electronic and thermal Enthalpies=    | -920.664931                 |
| Sum of electronic and thermal Free Energies= | -920.737505                 |

|       | E (Thermal) | CV             | S              |
|-------|-------------|----------------|----------------|
|       | Kcal/mol    | cal/mol-Kelvin | cal/mol-Kelvin |
| Total | 262.658     | 79.221         | 152.745        |

0 1

|    |   |   |           |           |           |
|----|---|---|-----------|-----------|-----------|
| 1  | 6 | 0 | -1.463683 | -0.824802 | -0.665588 |
| 2  | 6 | 0 | -3.387974 | -0.524662 | 0.375109  |
| 3  | 6 | 0 | -2.660247 | -1.718782 | -0.274697 |
| 4  | 1 | 0 | -1.534754 | -0.461573 | -1.693758 |
| 5  | 1 | 0 | -3.790544 | -0.701821 | 1.380773  |
| 6  | 1 | 0 | -3.202112 | -2.158532 | -1.118047 |
| 7  | 6 | 0 | -2.127767 | 0.363013  | 0.296629  |
| 8  | 6 | 0 | -2.231361 | 1.715152  | -0.406934 |
| 9  | 1 | 0 | -2.417350 | 1.631431  | -1.477830 |
| 10 | 1 | 0 | -3.064862 | 2.265276  | 0.038780  |
| 11 | 7 | 0 | -1.521512 | 0.703777  | 1.533667  |
| 12 | 6 | 0 | -0.889481 | 2.364666  | -0.049692 |
| 13 | 1 | 0 | -0.930021 | 3.454305  | -0.068020 |
| 14 | 1 | 0 | -0.122181 | 2.051835  | -0.766078 |
| 15 | 6 | 0 | -0.569011 | 1.801680  | 1.346414  |
| 16 | 1 | 0 | 0.468694  | 1.437098  | 1.405235  |
| 17 | 1 | 0 | -0.701325 | 2.541218  | 2.143496  |
| 18 | 8 | 0 | -2.232430 | -2.683306 | 0.655204  |
| 19 | 1 | 0 | -2.996678 | -3.206253 | 0.926316  |
| 20 | 8 | 0 | -4.357445 | 0.035077  | -0.476019 |
| 21 | 8 | 0 | -5.387437 | -0.949865 | -0.582874 |
| 22 | 1 | 0 | -6.152355 | -0.446217 | -0.266101 |
| 23 | 6 | 0 | 1.020067  | -0.819048 | -0.909342 |
| 24 | 1 | 0 | 0.972565  | -0.035933 | -1.660329 |
| 25 | 6 | 0 | 2.293974  | -1.306378 | -0.501958 |
| 26 | 6 | 0 | 4.618097  | -1.467974 | -0.348791 |
| 27 | 1 | 0 | 5.060009  | -0.738343 | 0.338588  |
| 28 | 1 | 0 | 5.352454  | -1.711185 | -1.119236 |
| 29 | 6 | 0 | 4.038189  | -2.695002 | 0.360440  |
| 30 | 1 | 0 | 4.550697  | -2.909608 | 1.297213  |
| 31 | 1 | 0 | 4.125695  | -3.571012 | -0.284988 |
| 32 | 6 | 0 | 2.555070  | -2.339944 | 0.562376  |



|    |   |   |           |           |           |
|----|---|---|-----------|-----------|-----------|
| 33 | 1 | 0 | 1.889999  | -3.199786 | 0.472927  |
| 34 | 1 | 0 | 2.364717  | -1.874968 | 1.537981  |
| 35 | 7 | 0 | 3.430202  | -0.858692 | -0.977809 |
| 36 | 6 | 0 | 3.561716  | 0.213170  | -1.960764 |
| 37 | 1 | 0 | 3.068576  | -0.070883 | -2.892820 |
| 38 | 1 | 0 | 3.119795  | 1.135911  | -1.576929 |
| 39 | 1 | 0 | 4.620146  | 0.378376  | -2.154436 |
| 40 | 6 | 0 | -1.127114 | -0.305087 | 2.482455  |
| 41 | 1 | 0 | -0.969221 | 0.158627  | 3.459742  |
| 42 | 1 | 0 | -1.893350 | -1.075251 | 2.577588  |
| 43 | 1 | 0 | -0.183136 | -0.806712 | 2.192977  |
| 44 | 6 | 0 | -0.124135 | -1.312594 | -0.361821 |
| 45 | 1 | 0 | -0.066839 | -2.116991 | 0.369476  |

## 19

|                                              |                             |
|----------------------------------------------|-----------------------------|
| Zero-point correction=                       | 0.394657 (Hartree/Particle) |
| Thermal correction to Energy=                | 0.415882                    |
| Thermal correction to Enthalpy=              | 0.416827                    |
| Thermal correction to Gibbs Free Energy=     | 0.343976                    |
| Sum of electronic and zero-point Energies=   | -920.631702                 |
| Sum of electronic and thermal Energies=      | -920.610476                 |
| Sum of electronic and thermal Enthalpies=    | -920.609532                 |
| Sum of electronic and thermal Free Energies= | -920.682382                 |

|       | E (Thermal) | CV             | S              |
|-------|-------------|----------------|----------------|
|       | Kcal/mol    | cal/mol-Kelvin | cal/mol-Kelvin |
| Total | 260.970     | 79.495         | 153.327        |

## 0 1

|    |   |   |           |           |           |
|----|---|---|-----------|-----------|-----------|
| 1  | 6 | 0 | -0.654018 | -0.919914 | -0.697587 |
| 2  | 6 | 0 | -3.014362 | -0.385945 | 0.145850  |
| 3  | 6 | 0 | -2.665366 | -1.634468 | 0.775436  |
| 4  | 1 | 0 | -1.188616 | -1.694682 | -1.242171 |
| 5  | 1 | 0 | -3.486829 | 0.334186  | 0.824518  |
| 6  | 1 | 0 | -2.743768 | -2.560789 | 0.207040  |
| 7  | 6 | 0 | -1.505801 | 0.281139  | -0.364315 |
| 8  | 6 | 0 | -1.829422 | 1.212617  | -1.544448 |
| 9  | 1 | 0 | -0.865625 | 1.403116  | -2.027653 |
| 10 | 1 | 0 | -2.497651 | 0.765665  | -2.278712 |
| 11 | 7 | 0 | -1.028419 | 1.173038  | 0.607435  |
| 12 | 6 | 0 | -0.587482 | 0.769652  | 1.923859  |
| 13 | 1 | 0 | -0.049849 | -0.178309 | 1.862597  |
| 14 | 1 | 0 | 0.095036  | 1.529682  | 2.316085  |
| 15 | 1 | 0 | -1.425432 | 0.673164  | 2.631564  |

|    |   |   |           |           |           |
|----|---|---|-----------|-----------|-----------|
| 16 | 6 | 0 | -2.384941 | 2.467551  | -0.864270 |
| 17 | 1 | 0 | -3.471709 | 2.395935  | -0.767154 |
| 18 | 1 | 0 | -2.167555 | 3.375845  | -1.426605 |
| 19 | 6 | 0 | -1.715152 | 2.462697  | 0.524673  |
| 20 | 1 | 0 | -0.985125 | 3.268395  | 0.655500  |
| 21 | 1 | 0 | -2.454928 | 2.562682  | 1.334872  |
| 22 | 8 | 0 | -2.298847 | -1.672387 | 2.005735  |
| 23 | 1 | 0 | -2.028729 | -2.557440 | 2.300978  |
| 24 | 8 | 0 | -3.757660 | -0.648215 | -1.002130 |
| 25 | 8 | 0 | -4.957753 | -1.296927 | -0.534063 |
| 26 | 1 | 0 | -5.591012 | -1.014290 | -1.212803 |
| 27 | 6 | 0 | 0.702180  | -1.004875 | -0.654912 |
| 28 | 1 | 0 | 1.104106  | -1.951678 | -1.015312 |
| 29 | 6 | 0 | 1.670106  | -0.044509 | -0.232845 |
| 30 | 1 | 0 | 1.339685  | 0.952647  | 0.030257  |
| 31 | 6 | 0 | 3.012405  | -0.335674 | -0.228775 |
| 32 | 6 | 0 | 5.332494  | 0.028344  | -0.127582 |
| 33 | 1 | 0 | 6.014743  | 0.352464  | 0.662405  |
| 34 | 1 | 0 | 5.708627  | 0.410290  | -1.086609 |
| 35 | 6 | 0 | 5.116971  | -1.485854 | -0.157361 |
| 36 | 1 | 0 | 5.194044  | -1.884985 | 0.856817  |
| 37 | 1 | 0 | 5.843216  | -2.001007 | -0.785967 |
| 38 | 6 | 0 | 3.674390  | -1.626312 | -0.667561 |
| 39 | 1 | 0 | 3.643365  | -1.680216 | -1.761985 |
| 40 | 1 | 0 | 3.169682  | -2.511338 | -0.277109 |
| 41 | 7 | 0 | 3.983746  | 0.529611  | 0.130646  |
| 42 | 6 | 0 | 3.727761  | 1.915600  | 0.447187  |
| 43 | 1 | 0 | 3.346082  | 2.462907  | -0.423517 |
| 44 | 1 | 0 | 2.992115  | 1.986636  | 1.254625  |
| 45 | 1 | 0 | 4.654344  | 2.382503  | 0.781345  |

## 20

|                                              |                             |
|----------------------------------------------|-----------------------------|
| Zero-point correction=                       | 0.394548 (Hartree/Particle) |
| Thermal correction to Energy=                | 0.417122                    |
| Thermal correction to Enthalpy=              | 0.418066                    |
| Thermal correction to Gibbs Free Energy=     | 0.339456                    |
| Sum of electronic and zero-point Energies=   | -920.708673                 |
| Sum of electronic and thermal Energies=      | -920.686099                 |
| Sum of electronic and thermal Enthalpies=    | -920.685155                 |
| Sum of electronic and thermal Free Energies= | -920.763765                 |

|       | E (Thermal) | CV             | S              |
|-------|-------------|----------------|----------------|
|       | Kcal/mol    | cal/mol-Kelvin | cal/mol-Kelvin |
| Total | 261.748     | 81.283         | 165.448        |

0 1

|    |   |   |           |           |           |
|----|---|---|-----------|-----------|-----------|
| 1  | 6 | 0 | -1.884760 | -0.048123 | -1.651792 |
| 2  | 6 | 0 | 1.443124  | -0.308267 | 0.638809  |
| 3  | 6 | 0 | -2.083316 | 0.350032  | -0.399181 |
| 4  | 1 | 0 | -2.342822 | 0.466404  | -2.493612 |
| 5  | 1 | 0 | 1.517107  | -0.206798 | -0.442814 |
| 6  | 1 | 0 | -1.659242 | -0.135739 | 0.472477  |
| 7  | 6 | 0 | 0.851012  | 0.731857  | 1.335344  |
| 8  | 1 | 0 | 0.693637  | 0.634083  | 2.404657  |
| 9  | 6 | 0 | 0.363679  | 1.868550  | 0.671530  |
| 10 | 6 | 0 | 0.627505  | 2.250754  | -0.764880 |
| 11 | 6 | 0 | -0.394144 | 3.366379  | -1.047457 |
| 12 | 1 | 0 | 0.516785  | 1.398826  | -1.438368 |
| 13 | 1 | 0 | 1.661993  | 2.604116  | -0.837570 |
| 14 | 6 | 0 | -0.812060 | 3.871052  | 0.339867  |
| 15 | 1 | 0 | 0.022424  | 4.162754  | -1.663685 |
| 16 | 1 | 0 | -1.263858 | 2.952349  | -1.559420 |
| 17 | 1 | 0 | -0.316448 | 4.803998  | 0.630613  |
| 18 | 1 | 0 | -1.893523 | 3.997407  | 0.433815  |
| 19 | 8 | 0 | -0.990054 | -1.052054 | -1.914638 |
| 20 | 1 | 0 | -1.269429 | -1.525024 | -2.706655 |
| 21 | 8 | 0 | -2.735734 | 1.543087  | -0.180038 |
| 22 | 8 | 0 | -3.392662 | 1.469066  | 1.082054  |
| 23 | 1 | 0 | -4.301256 | 1.244727  | 0.823866  |
| 24 | 7 | 0 | -0.382892 | 2.795811  | 1.241895  |
| 25 | 6 | 0 | -0.824531 | 2.760221  | 2.626770  |
| 26 | 1 | 0 | -1.326699 | 3.699239  | 2.855757  |
| 27 | 1 | 0 | -1.530798 | 1.937734  | 2.771189  |
| 28 | 1 | 0 | 0.030674  | 2.644853  | 3.296950  |
| 29 | 6 | 0 | 1.925334  | -1.490699 | 1.199884  |
| 30 | 1 | 0 | 1.906058  | -1.613536 | 2.277810  |
| 31 | 6 | 0 | 2.422262  | -2.515435 | 0.400552  |
| 32 | 6 | 0 | 2.509173  | -2.519921 | -1.109133 |
| 33 | 1 | 0 | 3.346524  | -1.880674 | -1.412551 |
| 34 | 1 | 0 | 1.599261  | -2.128427 | -1.567851 |
| 35 | 6 | 0 | 2.774229  | -3.996733 | -1.445091 |
| 36 | 1 | 0 | 3.387229  | -4.127117 | -2.336559 |
| 37 | 1 | 0 | 1.826458  | -4.517302 | -1.600059 |
| 38 | 6 | 0 | 3.101992  | -3.948754 | 2.275546  |
| 39 | 1 | 0 | 3.783608  | -3.227937 | 2.737942  |
| 40 | 1 | 0 | 2.139355  | -3.913463 | 2.793106  |
| 41 | 1 | 0 | 3.518828  | -4.949695 | 2.379286  |
| 42 | 7 | 0 | 2.924779  | -3.657119 | 0.864559  |
| 43 | 6 | 0 | 3.453571  | -4.536681 | -0.184298 |
| 44 | 1 | 0 | 3.198659  | -5.575979 | 0.035711  |

45 1 0 4.546377 -4.448321 -0.22333

## References

- (1) Meguellati, K.; Spichty, M.; Ladame, S. Reversible synthesis and characterization of dynamic imino analogues of trimethine and pentamethine cyanine dyes. *Org. Lett.* **2009**, *11*, 1123.
- (2) O'Shea, K. E.; Foote, C. S. Chemistry of singlet oxygen. 51. Zwitterionic intermediates from 2, 4-hexadienes. *J. Amer. Chem. Soc.* **1988**, *110*, 7167.
- (3) Singleton, D. A.; Hang, C.; Szymanski, M. J.; Meyer, M. P.; Leach, A. G.; Kuwata, K. T.; Chen, J. S.; Greer, A.; Foote, C. S.; Houk, K. Mechanism of ene reactions of singlet oxygen. A two-step no-intermediate mechanism. *J. Amer. Chem. Soc.* **2003**, *125*, 1319.
- (4) Clennan, E. L.; Lewis, K. K. Nucleophilic Trapping of Intermediates in the Singlet Oxygenations of Isomeric 1,4-Di-Tert-Butoxy-1,3-Butadienes. *J. Org. Chem.* **1986**, *51*, 3721.
- (5) Asveld, E. W. H.; Kellogg, R. M. Formation of 1,2-Dioxetanes and Probable Trapping of an Intermediate in the Reactions of Some Enol Ethers with Singlet Oxygen. *J. Amer. Chem. Soc.* **1980**, *102*, 3644.
